# Supplementary material for: Several phased siRNA annotation methods can frequently misidentify 24 nucleotide siRNA‐dominated PHAS loci
Source: PubMed Central journal article supplement (PMC6508839; doi:10.1002/pld3.101), 2018-12-17
Supplement: PLD3-2-e00101-s001.pdf [file PLD3-2-e00101-s001.pdf]

Figure S1 - page 1

### Eudicots

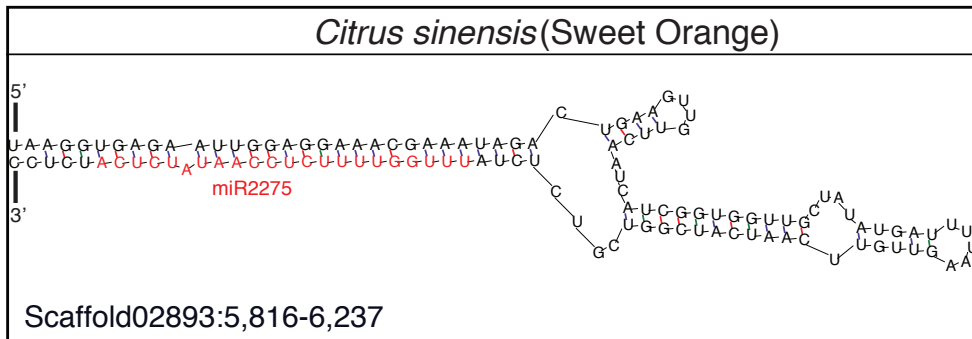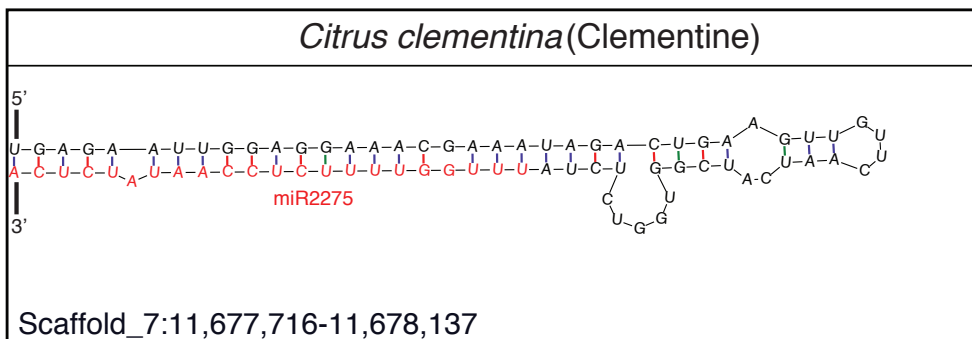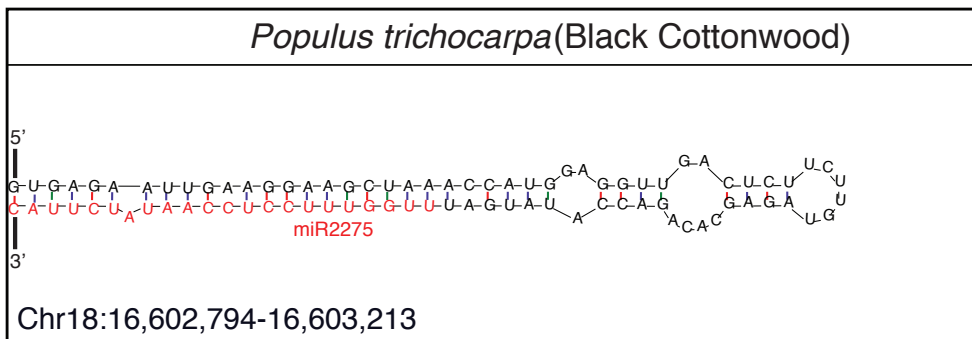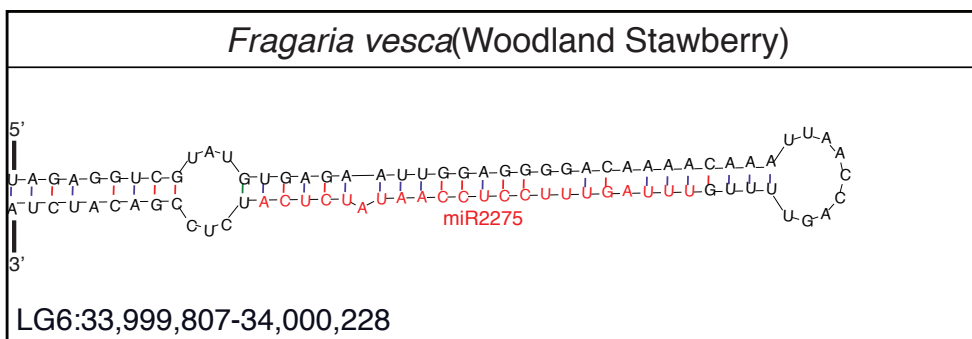

Figure S1 - page 2

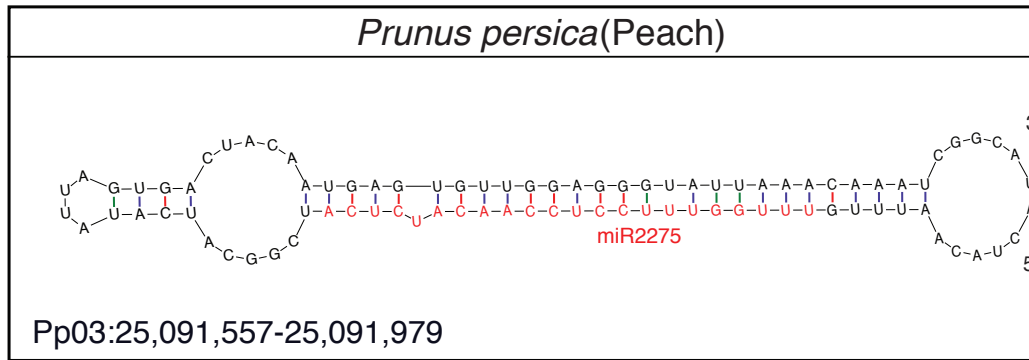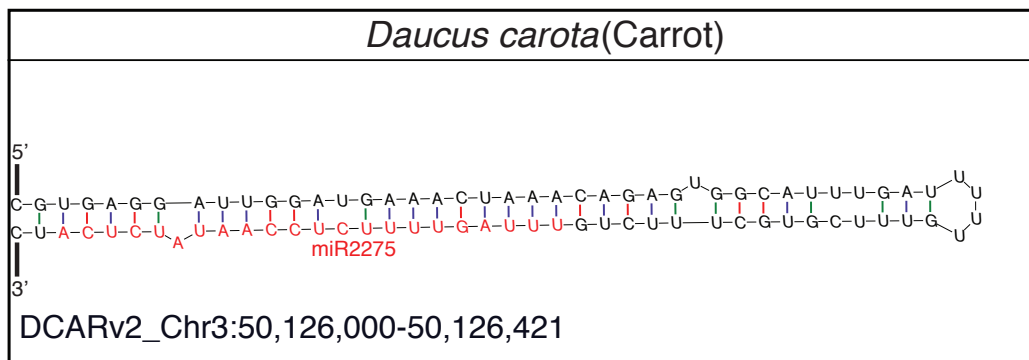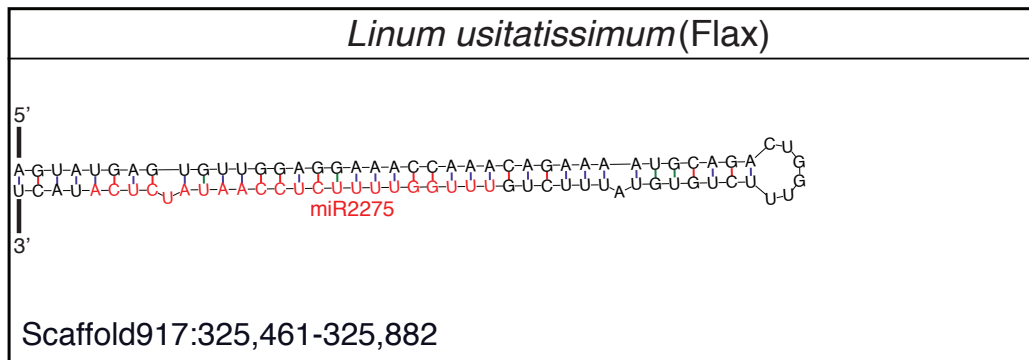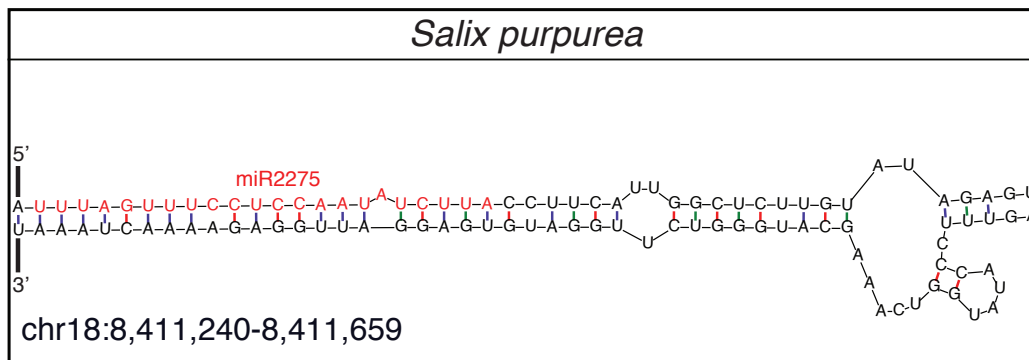

Figure S1 - page 3

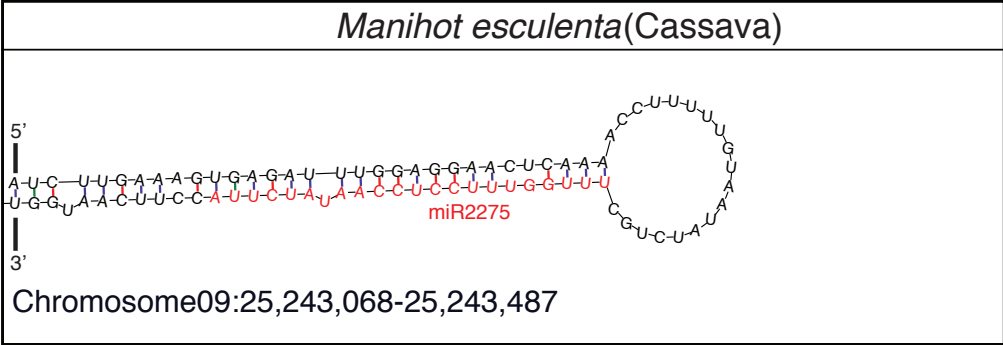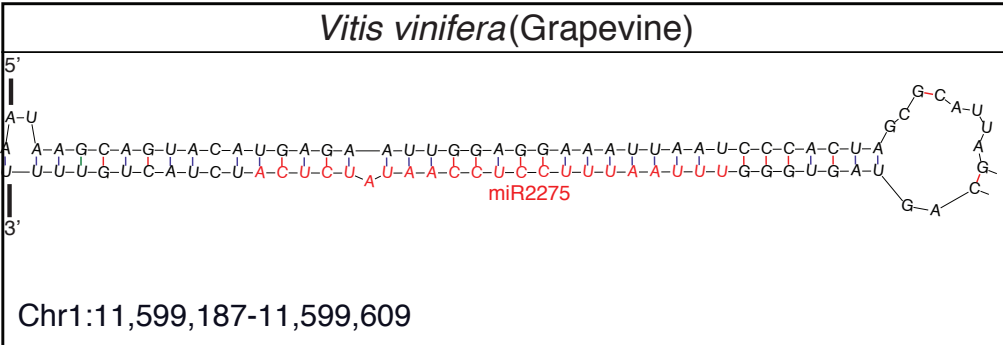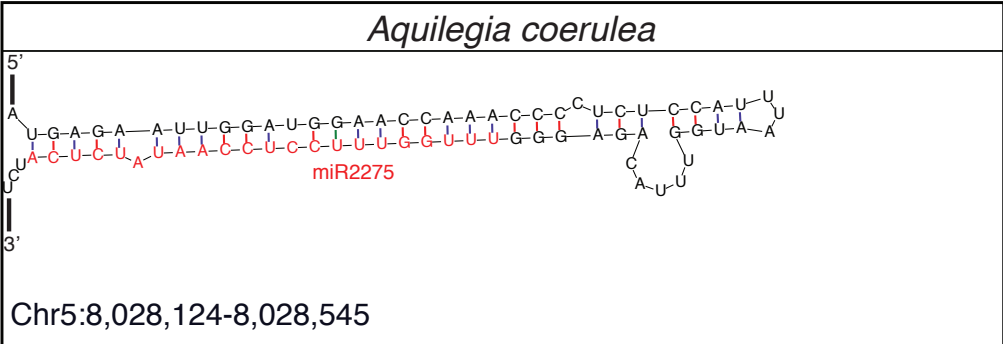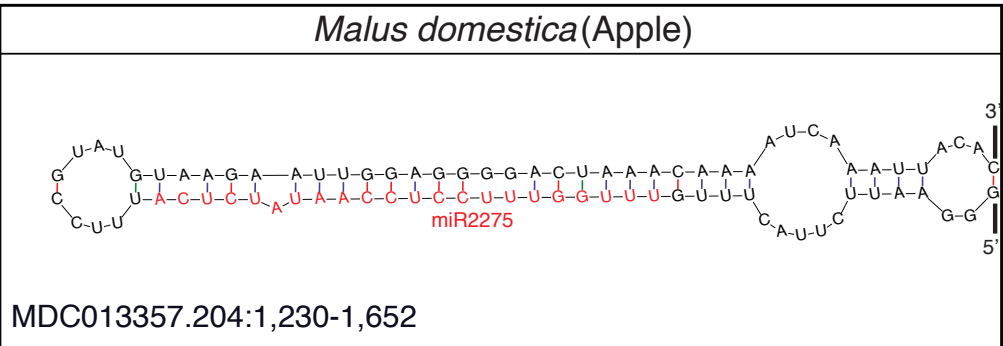

Figure S1 - page 4

Monocots

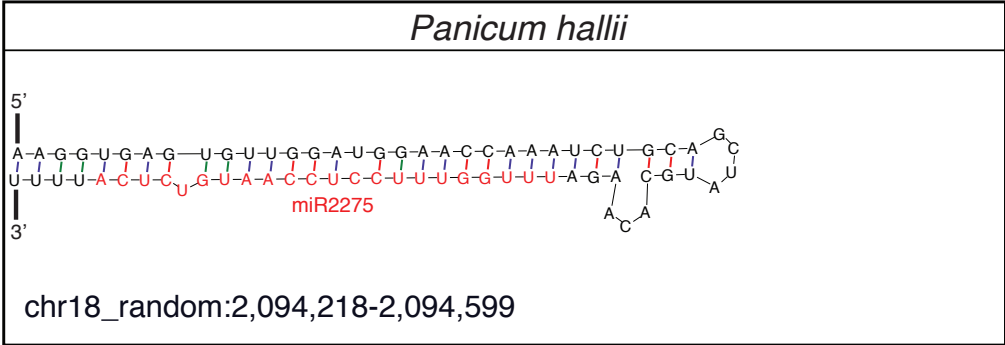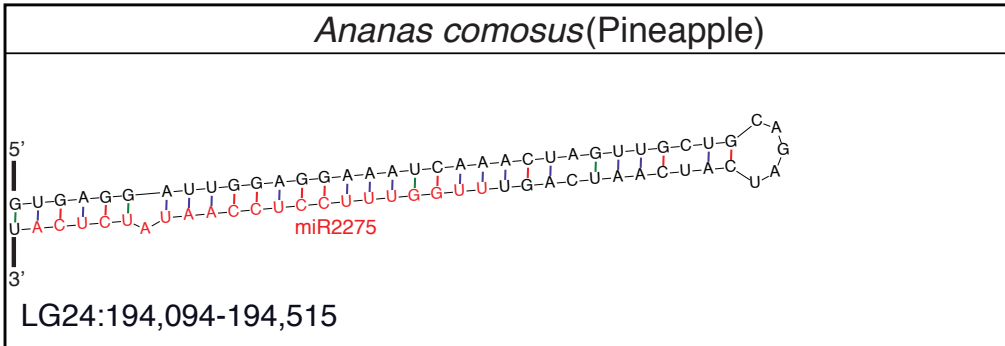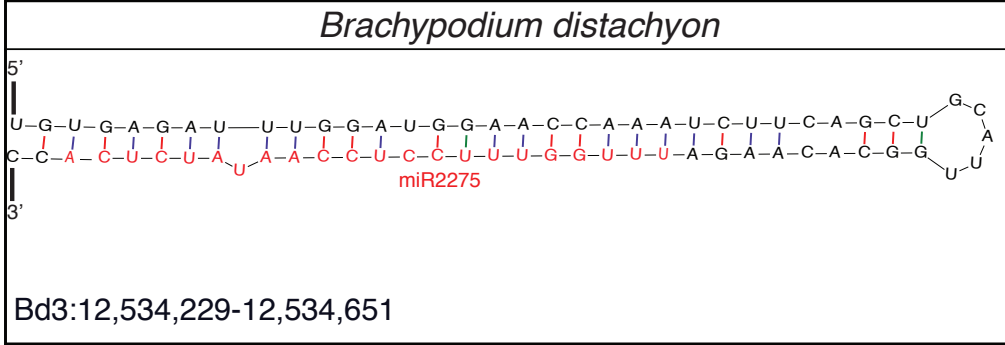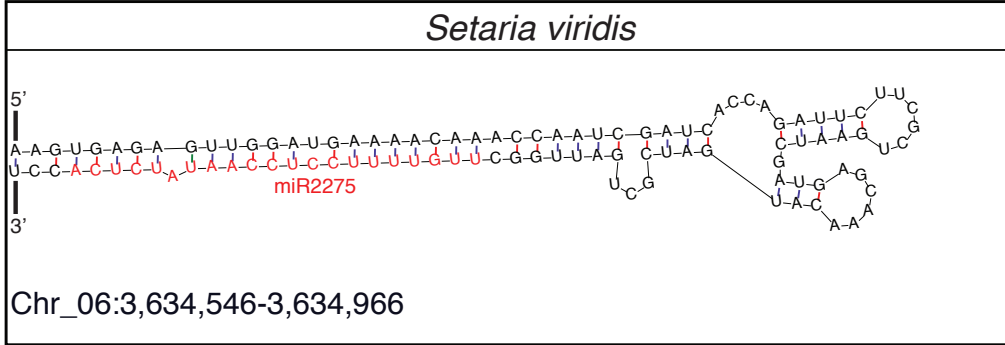

Figure S1 - page 5

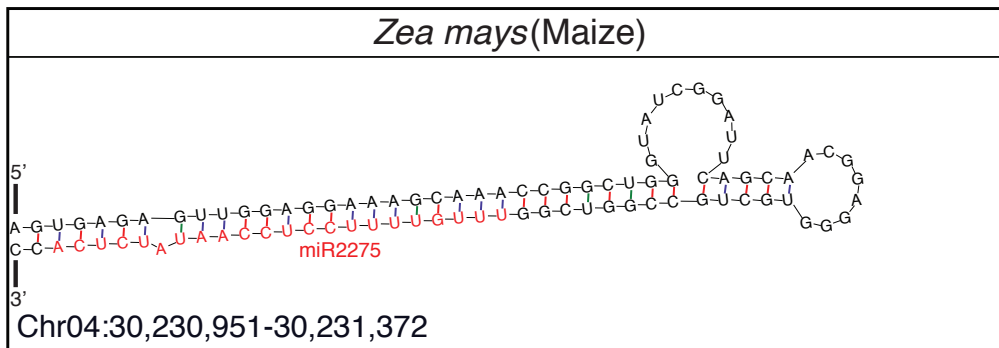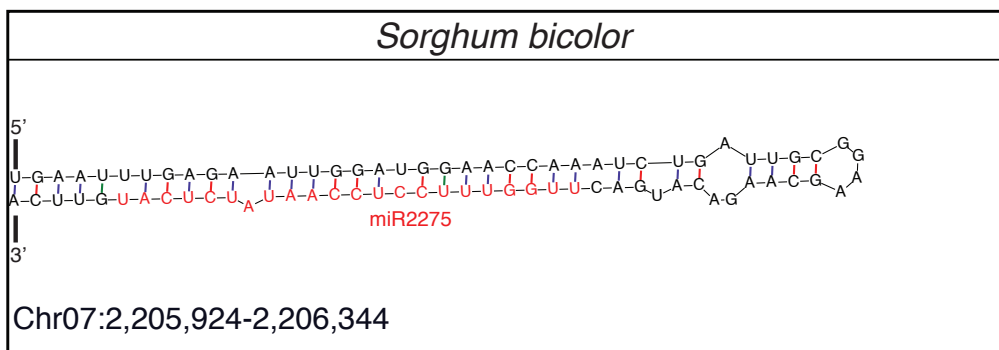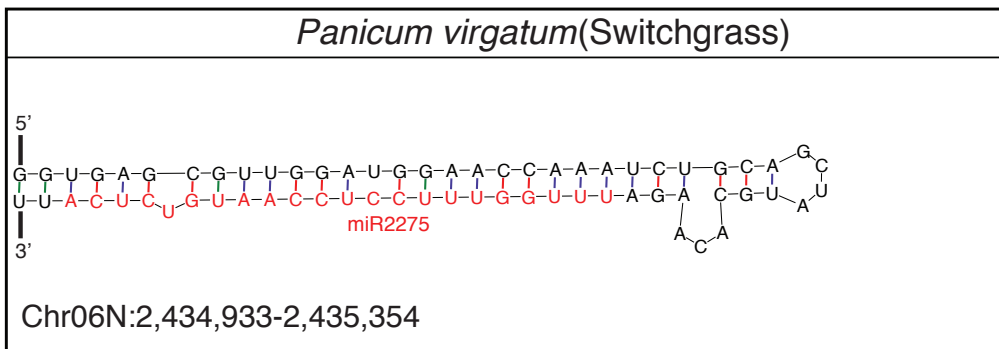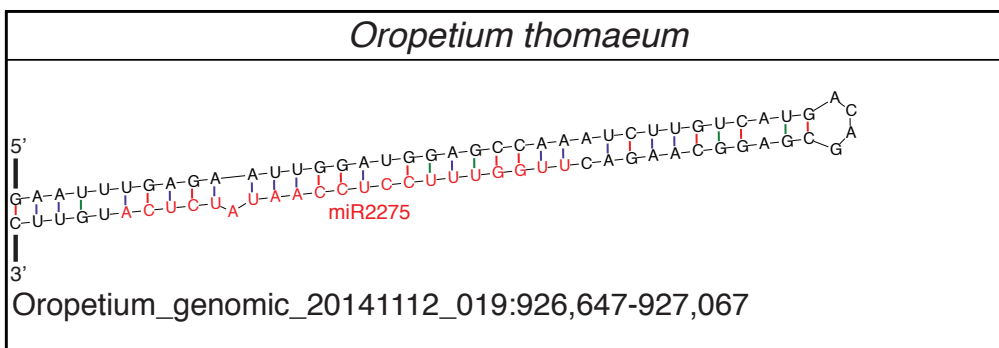

Figure S1 - page 6

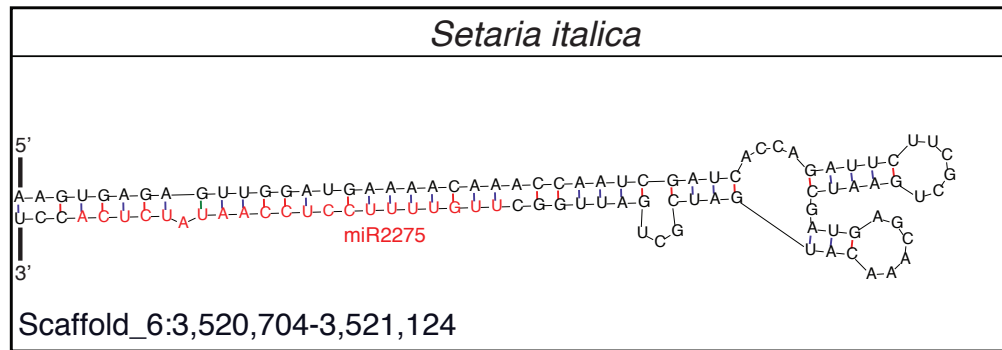

Figure S1. The RNA secondary structure of Bowtie-validated MIR2275 homologs. Secondary structures of loci were predicted via mFOLD. If the potential MIR2275 homolog formed a stem-and-loop structure, it is shown above. The red nucleotides denote the mature MIR2275 homolog in the secondary structure.

|                       |                                                                                                         |    |
|-----------------------|---------------------------------------------------------------------------------------------------------|----|
| <i>Phalli</i>         | AGTAGGCATGGCCATTGCAGA- - ATCAAA TTGGTACGGTGACTTAGCTTAGGTAGCATCAGAAATTCAGAAACCAAAA CTT                   | 78 |
| <i>Oropetium</i>      | AGTAGGCATGACAAATGCAGATCATATAGTAGGTGTGAGGAATTAAGCTGCATACCATGAAAA CAAA TTAGCCGAAA CTC                     | 80 |
| <i>Osativa</i>        | TGCAG - - - - TGACTGTAAAT - - - - GTGTGGAGTGGTAGCTTAGCTA - - - - GGCATCAGAAAA CCAAT AATCTT              | 59 |
| <i>Bdistachyon</i>    | GCTGA - - - - ATGCTGCAAGT - - - - AGTGGAGCTGGATGAACAGCTG - - - - AAATTTCTCAGGAACCT                      | 57 |
| <i>Pvirgatum</i>      | - - CAG - - - - ATGATGGGTA - - - - GTCAA GTAGTGCAGATAGACACT - - - - AGACTTCTCTGAAGAATT                  | 55 |
| <i>Acoerulea</i>      | TTCAGATACITTAATAA TAGAGAA - - - - GCATAAATGCCTTATTTAGTAGT - - - - TCATAGCTAAGCATAGAGTT                  | 66 |
| <i>Sitalica</i>       | TCCATA - - - - CTGTTATGACC - - - - AGCTAA - - - - TTT CAGGCACTGAAA - - - - GTGAGAGTTGGATGAAAA CA        | 58 |
| <i>Sviridis</i>       | TCCATA - - - - CTGTTATGACC - - - - AGCTAA - - - - TTT CAGGCACTGAAA - - - - GTGAGAGTTGGATGAAAA CA        | 58 |
| <i>Zmays</i>          | TCCACC - - - - CTGTTAAGAAA - - - - AGCTAGAAAA GTGTCAGGCACTGAAA - - - - GTGAGAGTTGGAGGAAA GCA            | 63 |
| <i>Acomosus</i>       | TCTACT - - - - TAGCTGAATGT - - - - AGAGTA - - - - TTGAGATAGAGAGA - - - - GATAGGGAGAGAGAGAGT             | 57 |
| <i>Mdomestica</i>     | TTGCTCCA - - - - ACATCTCATCT - - - - AC - CACTGGCTCTC AAA TCAAT - - - T - - - CAACATTTTATTGTTT          | 61 |
| <i>Fvesca</i>         | TTTCTCCA - - - - ATATCTCATTT - - - - CCAGCATCTAAA TTTCAA GTAATAGCT - - - - ATAAATATTTTCTGTTT            | 66 |
| <i>Ppersica</i>       | TTCTCCA - - - - ATATCTCATTT - - - - CCGACATCTAAA CTGAAAA TTAAT - - - - GGTTATTTCT - - - - CAATT         | 58 |
| <i>Lusitatissimum</i> | TTCTCCA - - - - ATATCTTATAT - - - - TCGCAGCTCTACTAGAGAT - CT - - - - GGTTAGTGGTGGCCAGCT                 | 61 |
| <i>Clemantina</i>     | ATTTTA - - - - CGTCCACTTTTCTT - - - - GTTT - ATACATCTGAAACTT - - - - TT - - - - GTGATAA TAGTGC AAC      | 61 |
| <i>Csinesis</i>       | ATGGTAAAGAAA TTTTGTGATA - - - - AATAGATGCAACTTAAGGTGAGAAAT - - - - GGAGGAAA CCAAA TAGAC                 | 67 |
| <i>Trichocarpa</i>    | AGTATCAA - - - - ATAATACAAAT - - - - - - - - GATTCTAGAAAA T - - - - - - - - GCAGTCAATGGATCT             | 51 |
| <i>Mesculenta</i>     | ATTTTATTGGGAAAGTGGCTGTTGTGTCTGCTCTCTCTTATAGTATCTGCTTAAAGCTGGCCAAATGGCCACC                               | 70 |
| <i>Spurpurea</i>      | ACTCTTTGCAC - TCAATGGTCT - - - - TTGATGTTTTACCAATGTGGATGGCTTTT - TGAATATTTTGAATTTT                      | 83 |
| <i>Vinifera</i>       | ACATGCCAAA TTTTCTGATAGT - - - - - - - - - - - - - - - - - - - - - - - - - - - - - - - - - - - - - - - - | 69 |
| <i>Dcarota</i>        | TATCTTACAAAGAAAA GGGGAAATAGTATAATTTCCCTGATATTACATCTATTCTACAAGGAAA CGCATACATCGG                          | 80 |
|                       | 100.....110.....120.....130.....140.....150.....160.....170.....18                                      |    |

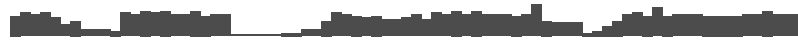

|                       |                                                                                                                         |     |
|-----------------------|-------------------------------------------------------------------------------------------------------------------------|-----|
| <i>Phalli</i>         | GGGGG - TTGAATTTGAGAAATGGATGGAA CCAAA TCTG - - - TTTGCGAA - - - - AGCGAGG - - - - CAAGACTT                              | 140 |
| <i>Oropetium</i>      | TGGCAG - TTGAATTTGAGAAATGGATGGAGCCAAA TCTG - - - TC - ATGAC - - - - AGCGAGG - - - - CAAGACTT                            | 141 |
| <i>Osativa</i>        | TGGCAG - TTGAATTTGAGAGTTGGATGGGACCAAA TCTA - - - CTGCAGACTTGCAGATTAAGG - - - - CAAGATTT                                 | 127 |
| <i>Bdistachyon</i>    | GGGAG - CTGAATGTGAGATTTGGATGGAA CCAAA TCTT - - - - CAAGCTGC - - - - ATTGGCA - - - - CAAGATTT                            | 117 |
| <i>Pvirgatum</i>      | TGGAG - CTGAAGGTGAGCGTTGGATGGAA CCAAA TCTG - - - - CAAGCTAT - - - - GCA - - - - CAAGATTT                                | 111 |
| <i>Acoerulea</i>      | - - - - - - - - - - - - - - - - - - - - - - - - - - - - - - - - - - - - - - - - - - - - - - - - - - - - -               | 131 |
| <i>Sitalica</i>       | AACCAA - - - - TOGATCACCAGATTCTTCTGCTGAATCGATGAG - - - - CAAA CAT - - - - GATCGCTG - - - - ATTTGCTT                     | 119 |
| <i>Sviridis</i>       | AACCAA - - - - TOGATCACCAGATTCTTCTGCTGAATCGATGAG - - - - CAAA CAT - - - - GATCGCTG - - - - ATTTGCTT                     | 119 |
| <i>Zmays</i>          | AACCGG - CTGGGATCGGATTCAGC - - - - - - - - - - - - - - - - - - - - - - - - - - - - - - - - - - - - - - - -              | 112 |
| <i>Acomosus</i>       | TGAGCA - CTGAATGTGAGGATTTGGATGGAA CCAAA CCGC - - - - TCTCCATTTAATGGTTTACA - - - - GAGGCTT                               | 119 |
| <i>Mdomestica</i>     | TAAAA G - - - - CGTATGTAGAAATGGAGGGACTAAA CAAA TCAAATACACGGGGAAATCTTA - - - - CTTTCTT                                   | 132 |
| <i>Fvesca</i>         | TAGAGG - TOGATGTGAGAAATGGAGGGACAAA CA - - - - - - - - - - - - - - - - - - - - - - - - - - - - - - - - - -               | 120 |
| <i>Ppersica</i>       | TAAAG - - - - TOGATATGAGTGTGGAGGGTATAAA CA - - - - - - - - - - - - - - - - - - - - - - - - - - - - - - - - - -          | 127 |
| <i>Lusitatissimum</i> | TGGCAGAGTCAGTATGAGTGTGGAGGAAA CCAAA CA - - - - - - - - - - - - - - - - - - - - - - - - - - - - - - - - - -              | 133 |
| <i>Clemantina</i>     | CGGAGG - - - - TG - - - - AGAATTTGGAGGAAA CCAAA TAA - - - - - - - - - - - - - - - - - - - - - - - - - - - - - - - - - - | 125 |
| <i>Csinesis</i>       | TGAAGT - - - - TGTTCATCATCGGTGGTGCATATGATT - - - - TTAAGTGTTCATCATCGGTGCT - - - - CTCTATTT                              | 135 |
| <i>Trichocarpa</i>    | TGAAA G - - - - - - - - - - - - - - - - - - - - - - - - - - - - - - - - - - - - - - - - - - - - - - - - - - - - -       | 122 |
| <i>Mesculenta</i>     | CACATATCTTGAAA GTGAGATTTGGAGGAACTCAAAA CTTT - - - - TTTGATA - - - - - - - - - - - - - - - - - - - - - -                 | 138 |
| <i>Spurpurea</i>      | TACAAC - - - - AAGTAAACATACAAGTTGCTCATCTTTGAGTGCAGGCA - - - - - - - - - - - - - - - - - - - - - - - - - - - - -         | 129 |
| <i>Vinifera</i>       | AATAAG - CAGTACATGAGAAATGGAGGAAATTAATCCCA - - - - - - - - - - - - - - - - - - - - - - - - - - - - - - - - - -           | 135 |
| <i>Dcarota</i>        | TAATGT - - - - TGAACGTGAGGATTTGGATGAAA CTA AAA CA - - - - - - - - - - - - - - - - - - - - - - - - - - - - - - - - - -   | 151 |
|                       | 0.....190.....200.....210.....220.....230.....240.....250.....26                                                        |     |

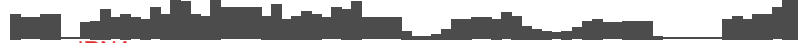

|                       |                                                                                                                    |     |
|-----------------------|--------------------------------------------------------------------------------------------------------------------|-----|
| <i>Phalli</i>         | GGTTTCTCCAAATATCTCA GTTCAGCTG - - - - - AGCTGATCAGATGGATGCGTA - GTGCAAGTAGTGCAGAT - GTAC                           | 211 |
| <i>Oropetium</i>      | GGTTTCTCCAAATATCTCA GTTCACATGTT CAGA - AAA TGGTGGTTCAGTT CACCCTT CAGGTAGTGTAGCTAGCAC                               | 220 |
| <i>Osativa</i>        | GGTTTCTCCAAATATCTCA GTTCAGTTGTC - - - - AGACAGTGAAT - - - - AATG - - - - GTGCAATTAGTG - AGCT - - - -               | 189 |
| <i>Bdistachyon</i>    | GGTTTCTCCAAATATCTCA CTTCAACTGCCG - - - - AGATGAGCCCAACACATCCTCGGTCAAGCAATC - AGTGACCCT                             | 193 |
| <i>Pvirgatum</i>      | GGTTTCTCCAAATGTCCTA TTTCAACTGTCCAA - - - - ATGCAACATTGA - GGOGTTTT CAGGGTATTAATCATTCAATGAT                         | 189 |
| <i>Acoerulea</i>      | GGTTTCTCCAAATATCTCA CTTCAACAA TTTTC - - - - AACTACAGTATATATTTTCAA TTAATAATCCATTC - - - -                           | 202 |
| <i>Sitalica</i>       | GI TTTCTCCAAATATCTCA CTTTCAGTGCATC - - - - GCCTGGTACTACGCATTACGAGAACAGATATGCTAGGG - - - -                          | 190 |
| <i>Sviridis</i>       | GI TTTCTCCAAATATCTCA CTTTCAGTGCATC - - - - GCCTGGTACTACGCATTACGAGAACAGATATGCTAGGG - - - -                          | 190 |
| <i>Zmays</i>          | GI TTTCTCCAAATATCTCA CTTTCAGTGCATA - - - - GTCTGATGAAGATGTACACTACCAACA - - - - - - - - - - - - - - - - - - - - - - | 171 |
| <i>Acomosus</i>       | GGTTTCTCCAAATATCTCA CTTCACTTGCITTT - - - - GGCTATTGGCTATTACTGTTGTTATTAATTTCTTC - - - - - - - - - - - -             | 186 |
| <i>Mdomestica</i>     | GGTTTCTCCAAATATCTCA TTTCCGGCTTTAAA - - - - AGCCATATTTGAGAA TACGAGAGGGCTAAA CAAA TTAATCTCCC                         | 209 |
| <i>Fvesca</i>         | AGTTTCTCCAAATATCTCA TCTCCGACTCTAA - - - - AGTGTAACTTTTATCTATAGC - - - - TTTAAAA GTTGGATGTAAG                       | 193 |
| <i>Ppersica</i>       | GGTTTCTCCAAATATCTCA TCTCCGACTCTGA - - - - AGTGTAACTTTTATCTATAGC - - - - TTTAAAA GTTGGATGTAAG                       | 197 |
| <i>Lusitatissimum</i> | GGTTTCTCCAAATATCTCA TCTCCGGC - - - - - - - - - - - - - - - - - - - - - - - - - - - - - - - - - - - - - - - - -     | 198 |
| <i>Clemantina</i>     | GGTTTCTCCAAATATCTCA CTTCAAGTTTGTACTC - - - - AGATTCTGTCT - CACCACAGTAA TTAATAGACTTGTCT - - - -                     | 198 |
| <i>Csinesis</i>       | GGTTTCTCCAAATATCTCA CTTCAAGTTTGTACTC - - - - AGATTCTGTCT - TACCGTAGTAA TTAATAGACTTGTCT - - - -                     | 208 |
| <i>Trichocarpa</i>    | GGTTTCTCCAAATATCTCA CTTTCAATGGCATTAA - - - - GAAA GCAA CAGAGGAA GATCTAGTCTTTGTTGACCATAT - - - -                    | 196 |
| <i>Mesculenta</i>     | GGTTTCTCCAAATATCTCA CTTTCAATGGTGTGT - - - - GAAAA TCACTGTAGCATTTGTTTCTGAGAAA GATGAGGT - - - -                      | 210 |
| <i>Spurpurea</i>      | AGTTTCTCCAAATATCTCA CTTTCAATGGTGTGTATAGAGTAGTGAAGTAGTAAAA GAACTGTCTTCTTTAGCT                                       | 209 |
| <i>Vinifera</i>       | AA TTTCTCCAAATATCTCA CTTACTGTTTCACTCTACATGTCAAATTTTCTGGTCT - ATCAGATGAAA TTTGTGTTG                                 | 214 |
| <i>Dcarota</i>        | AGTTTCTCCAAATATCTCA CTTCAAACCTTACTC - TTTTAGTACAGTAAA TAGAATCTTGCATTAAGCAGCACA - - - -                             | 225 |
|                       | 0.....270.....280.....290.....300.....310.....320.....330.....34                                                   |     |

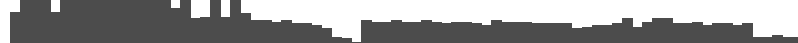

Figure S2. Alignment of MIR2275 homologs. Sequences corresponding to miR2275 with flanking 200 bp islands were extracted from genomes of the above-listed genomes and aligned via ClustalX2. Only the 100th to 340th nucleotide of each sequence (including gaps) are shown. miR2275 and miR2275\* in each species are shown.

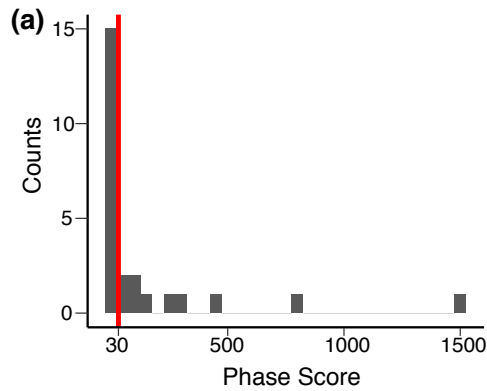

$$S = PR * PN * \ln(1+PARpm)$$

S is the Phase Score.  
 PR is the Phase Ratio.  
 PN is the number of distinct, "in-phase" reads.  
 PARpm is the accumulation of "in-phase" reads (in Reads Per Million).

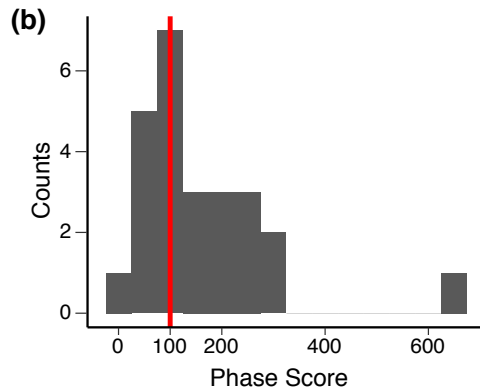

$$S = \ln \left[ \left( 1 + C * \frac{\sum_{i=1}^C P_i}{\sum U} \right)^{n-2} \right], n > 4$$

S is the Phase Score.  
 C is the number of 21 nt or 24 nt Phase Cycles that fits into the PHAS locus.  
 P is the number of "in-phase" reads.  
 U is the number of "out-of-phase" reads.  
 n is the number of phase cycles with at least one read.

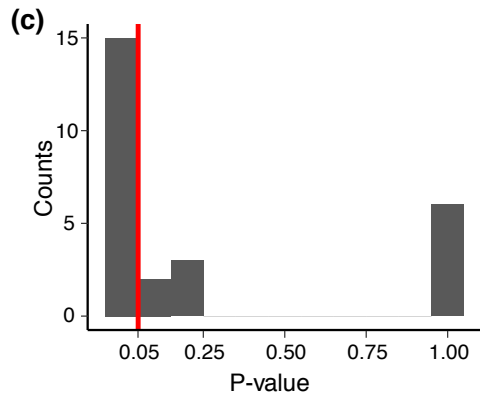

$$P\text{-val} (X=k) = \sum_{X=k}^m \frac{\binom{(H-1)m}{n-k} \binom{m}{k}}{\binom{Hm}{n}}$$

P-val= p-value with null hypothesis that a locus is a true PHAS.  
 k is the number of unique 21 nt or 24 nt "in phase" reads.  
 m is the number of phase cycles.  
 H is 21 or 24.  
 n is the number of unique 21 nt or 24 nt reads in a particular locus.

Figure S3. Determination of phase score cutoffs using three different algorithms  
 (a) Small RNA accumulation at 27 known 21 nt PHAS loci (Table S1) was analyzed using the PHAS-Test algorithm from Guo et al. (2015), which is used by ShortStack. Variables and formula are shown. Red line represents the cut-off used in this study to determine if a locus was phased or not; scores above the red line were considered 'phased'.  
 (b) Same as in panel a except for the PHAS-Test algorithm from Dotto et al. (2014).  
 (c) Same as in panel a except for the PHAS-Test algorithm from Zheng et al. (2014); scores below the red-line were considered 'phased'.



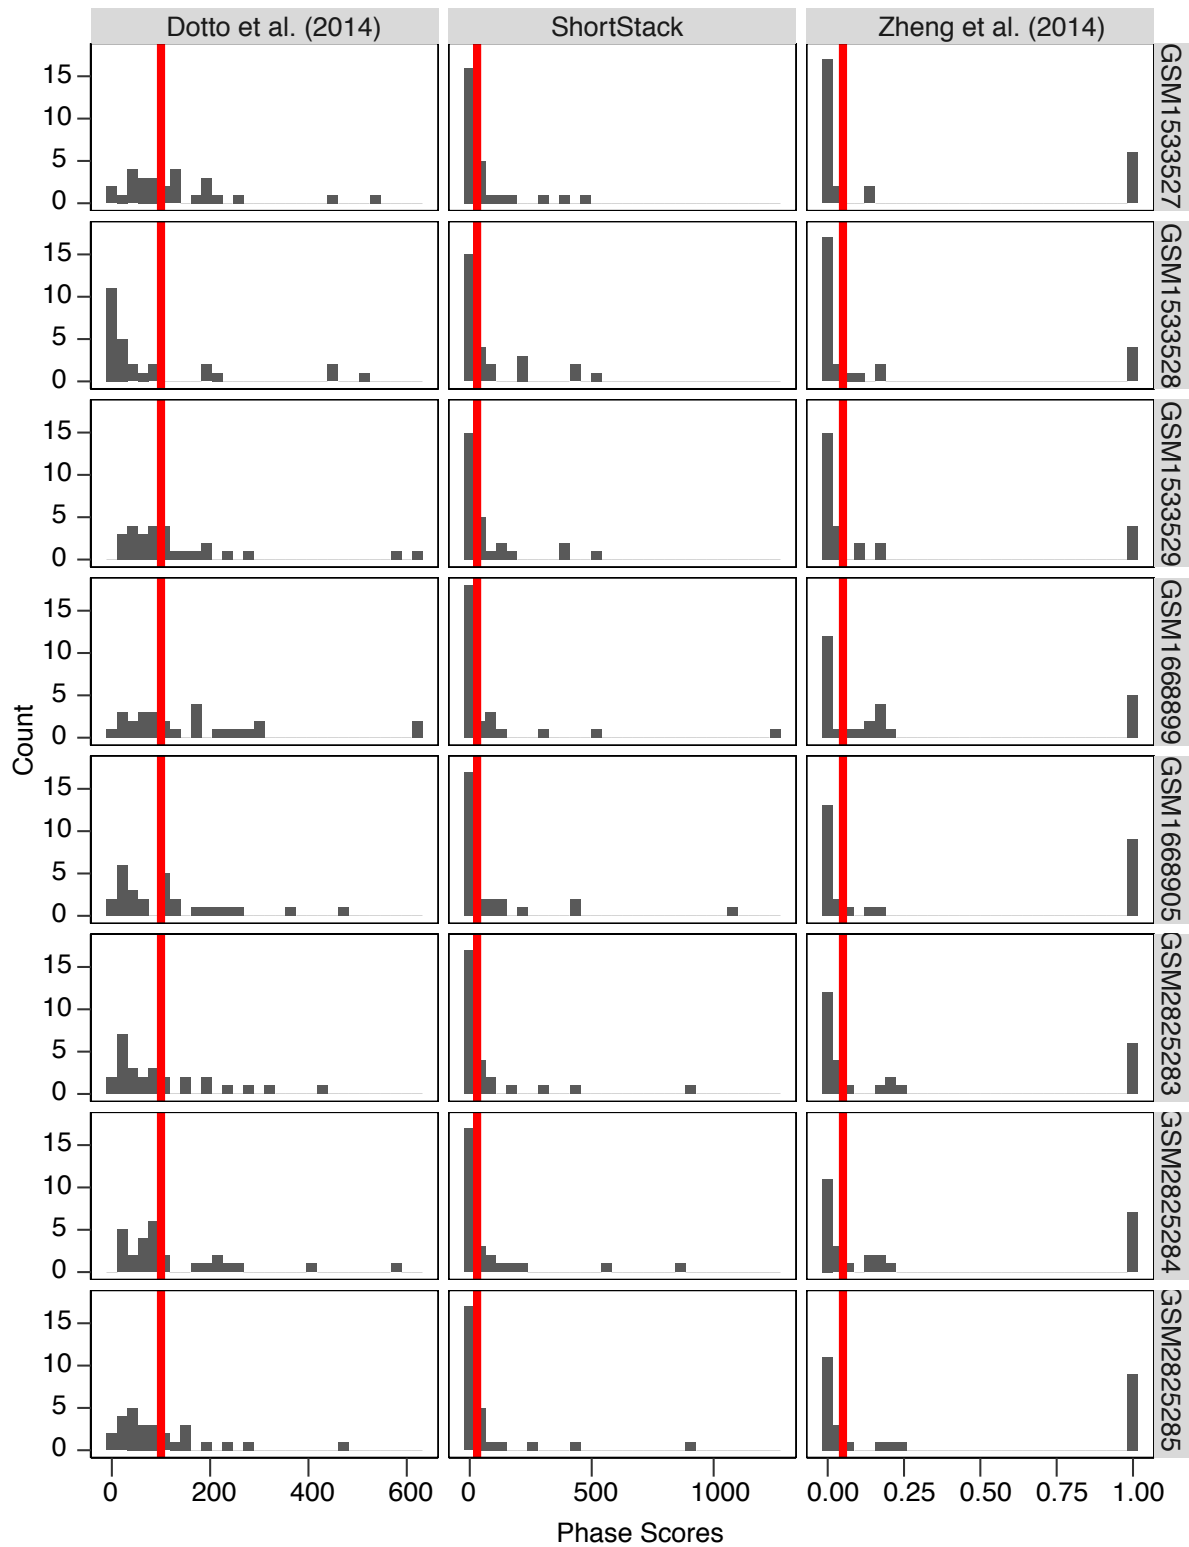

Figure S4. Phase scores of 27 previously known *A. thaliana* phased siRNA loci from the indicated algorithms. Cutoff values for called 'phasing' in our study are shown in red.

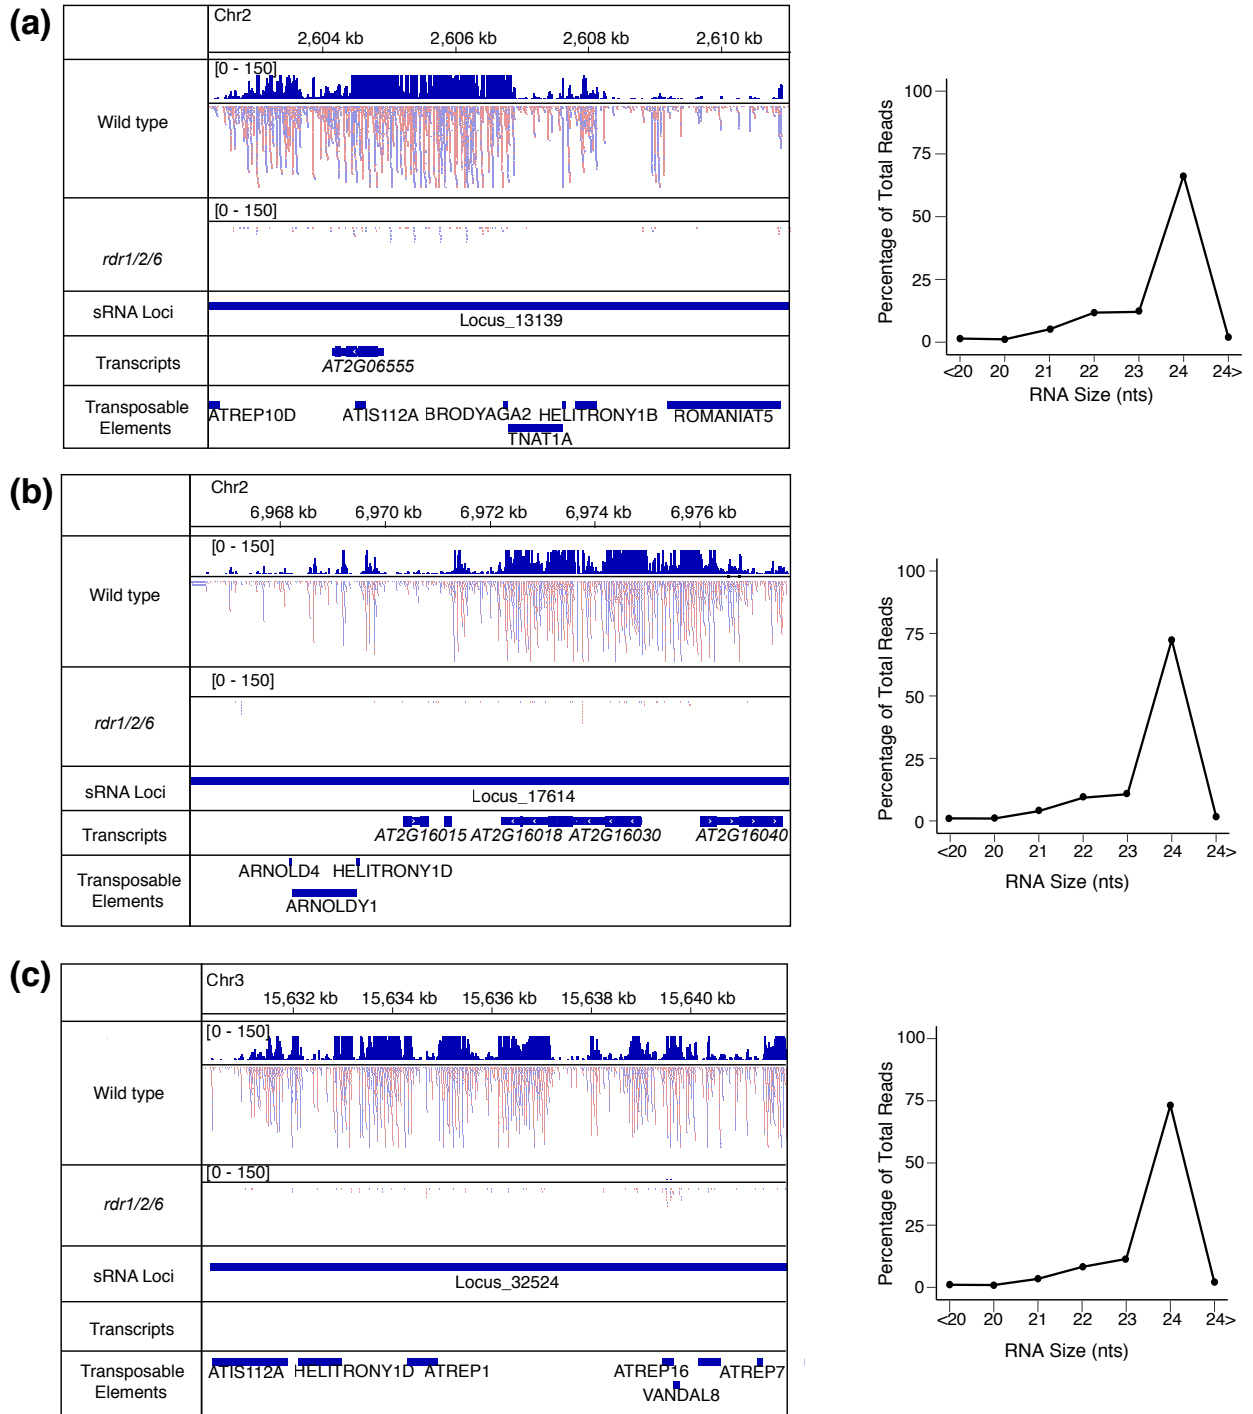

Figure S5. Genome browser snapshots of the three *Arabidopsis thaliana* PHAS-Test passing loci.

(a) Alignments and read size distribution of Locus\_13139. Red reads represent positive-strand mapped genes, while blue reads are those that mapped to the negative strand. Numbers in the brackets are the range of coverage shown in Reads per Million.

(b) Same as a, except for Locus\_17614.

(c) Same as a, except for Locus\_32524.





Figure S6 - Page 3

### Locus\_32524

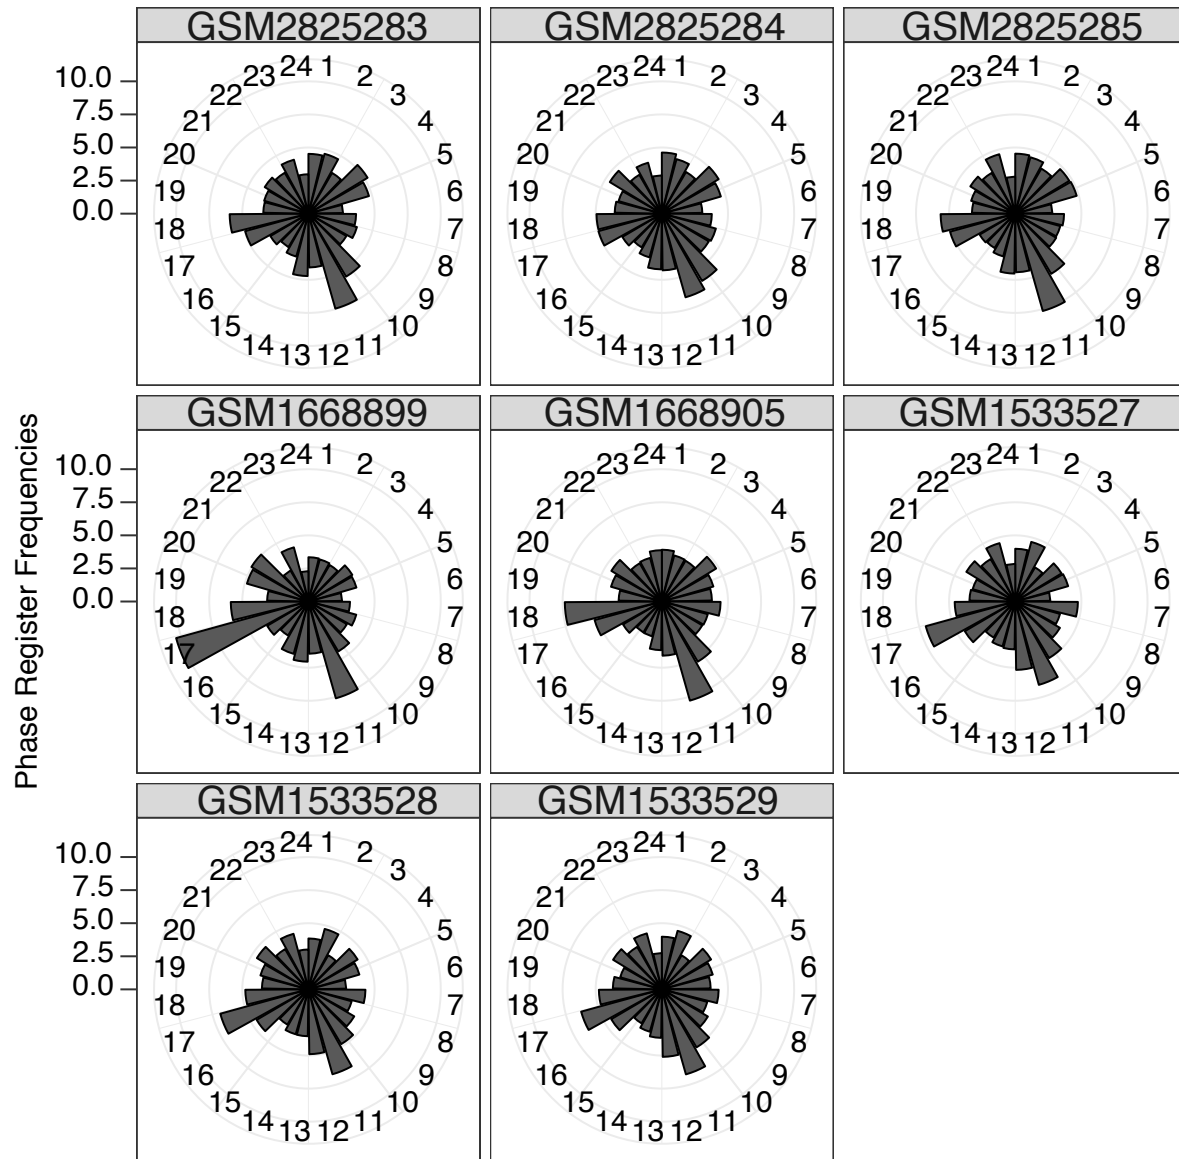

Figure S6 - Page 4

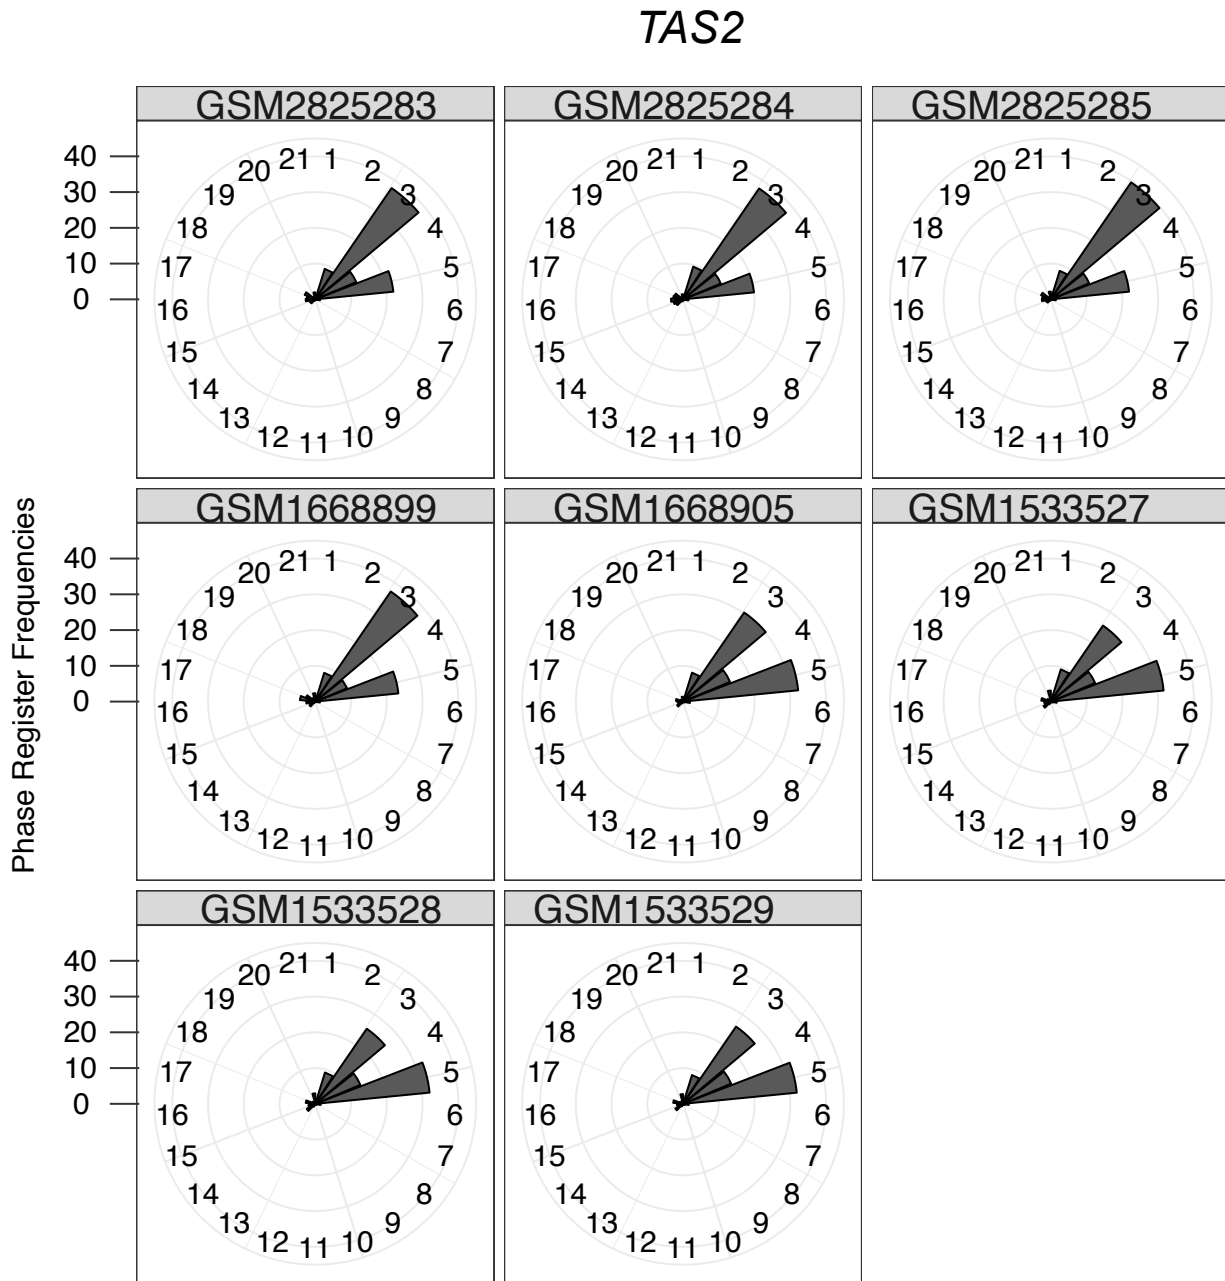

Figure S6. The three PHAS-Test passing loci have inconsistent phase register frequencies. Frequencies of phase registers were calculated in eight publicly available wild-type inflorescence libraries from *A. thaliana* (the accession numbers are listed in the grey boxes). TAS2 is shown for comparison. Phase register frequencies are calculated via the following formula: (number of reads “in phase”/ total number of reads at locus)\*100.

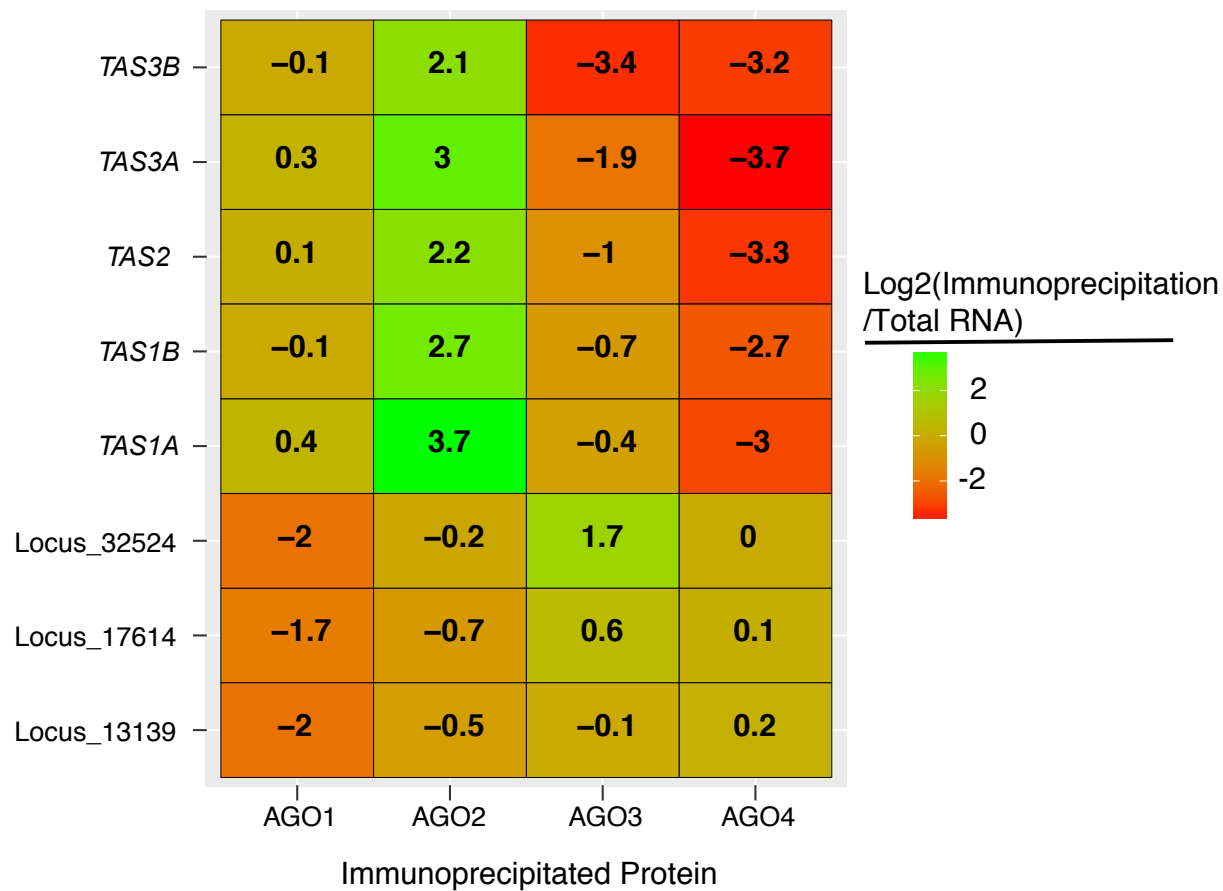

Figure S7. The three putative 24 nt PHAS loci show AGO-loading profiles that are distinct from TAS loci.

Small RNAs from immunoprecipitation protein were aligned to the *A. thaliana* (TAIR10) genome. Numbers indicate the ratio of sRNA accumulation between immunoprecipitated and total libraries (in RPMs).

Figure S8 - Page 1

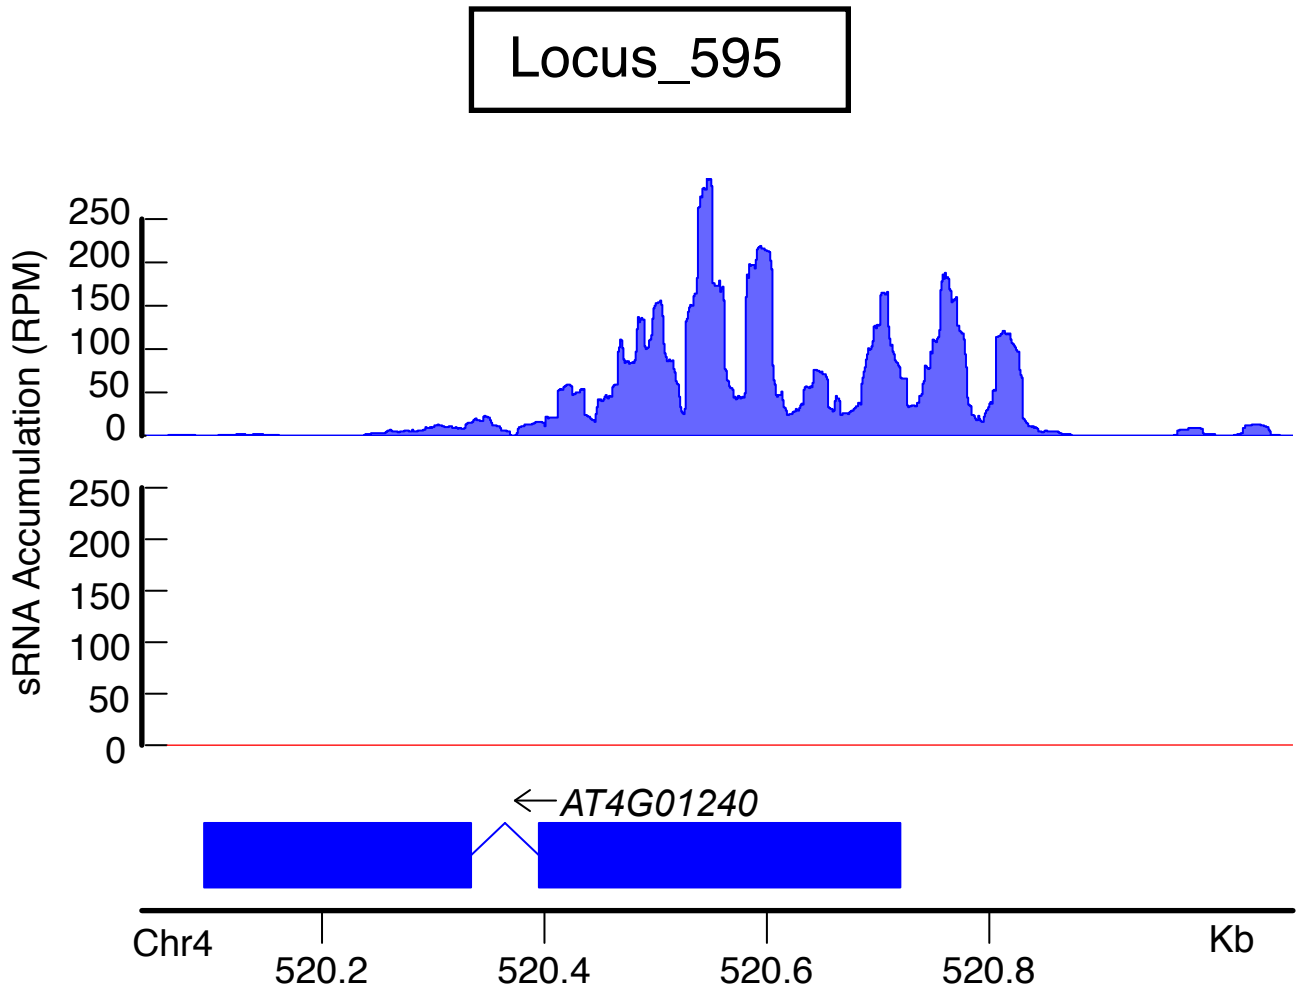



Figure S8 - Page 2

Locus\_12303

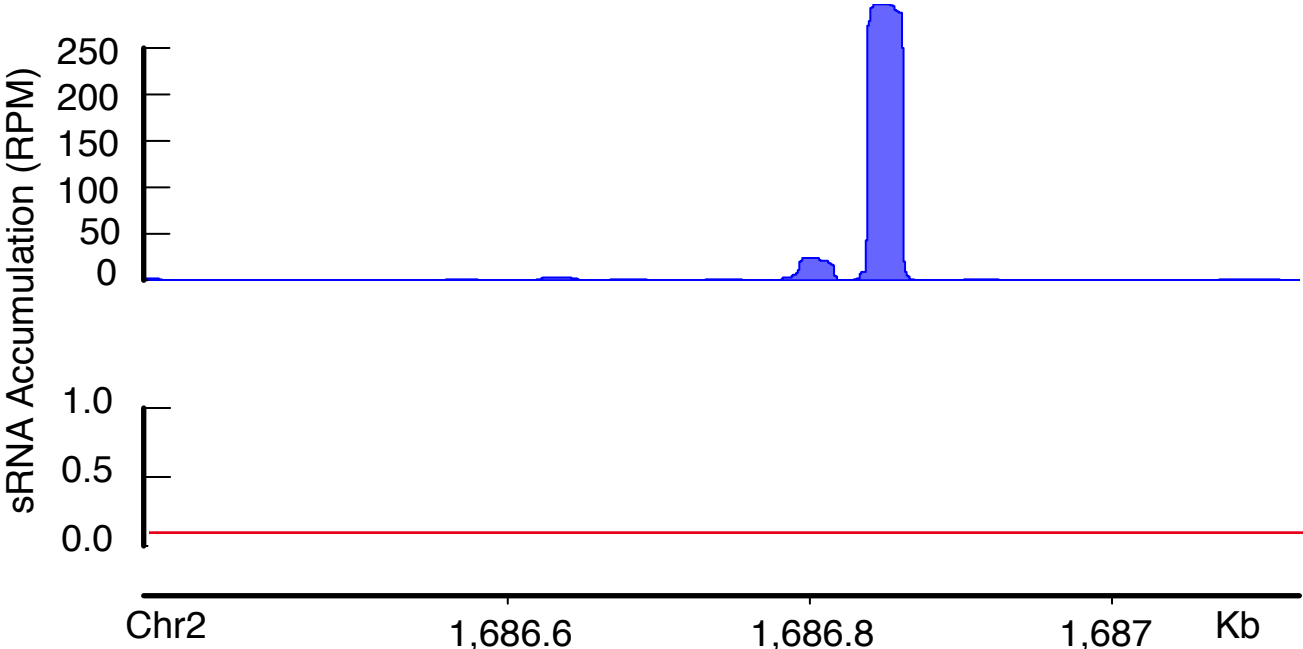

Figure S8 - Page 3

Locus\_17665

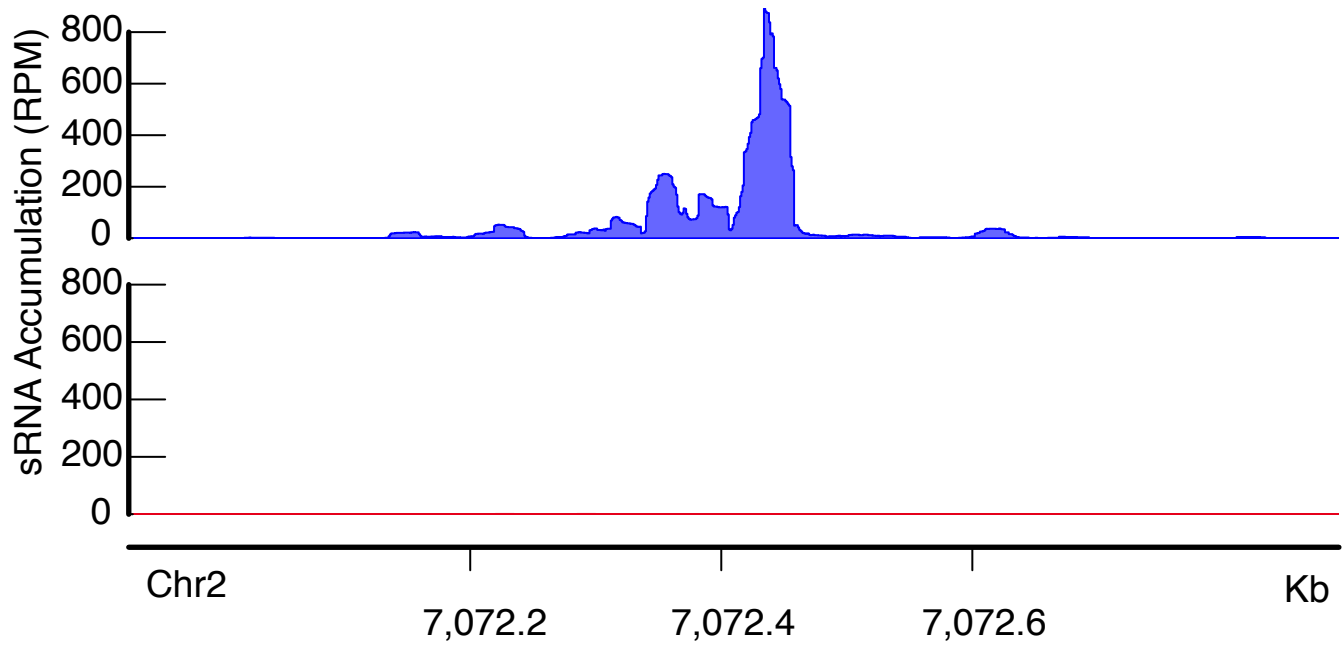

Figure S8 - Page 4

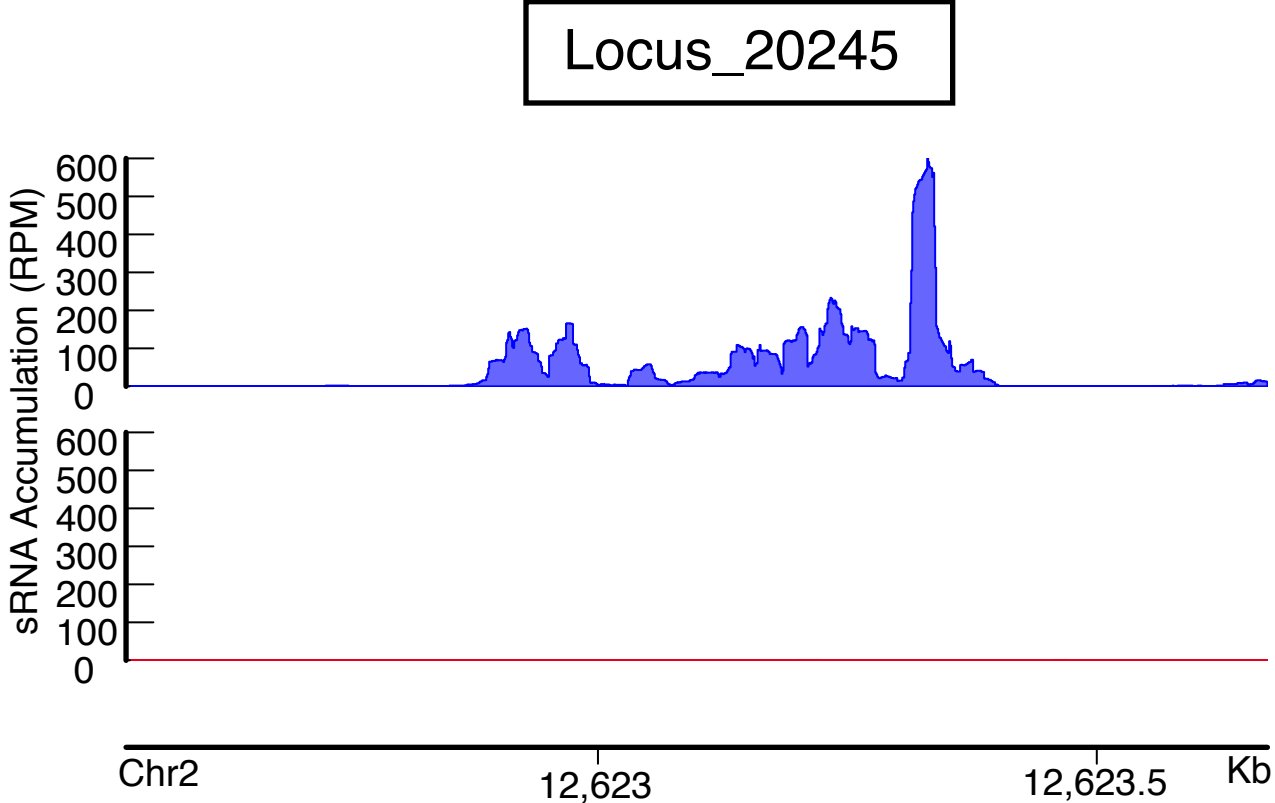

Figure S8 - Page 5

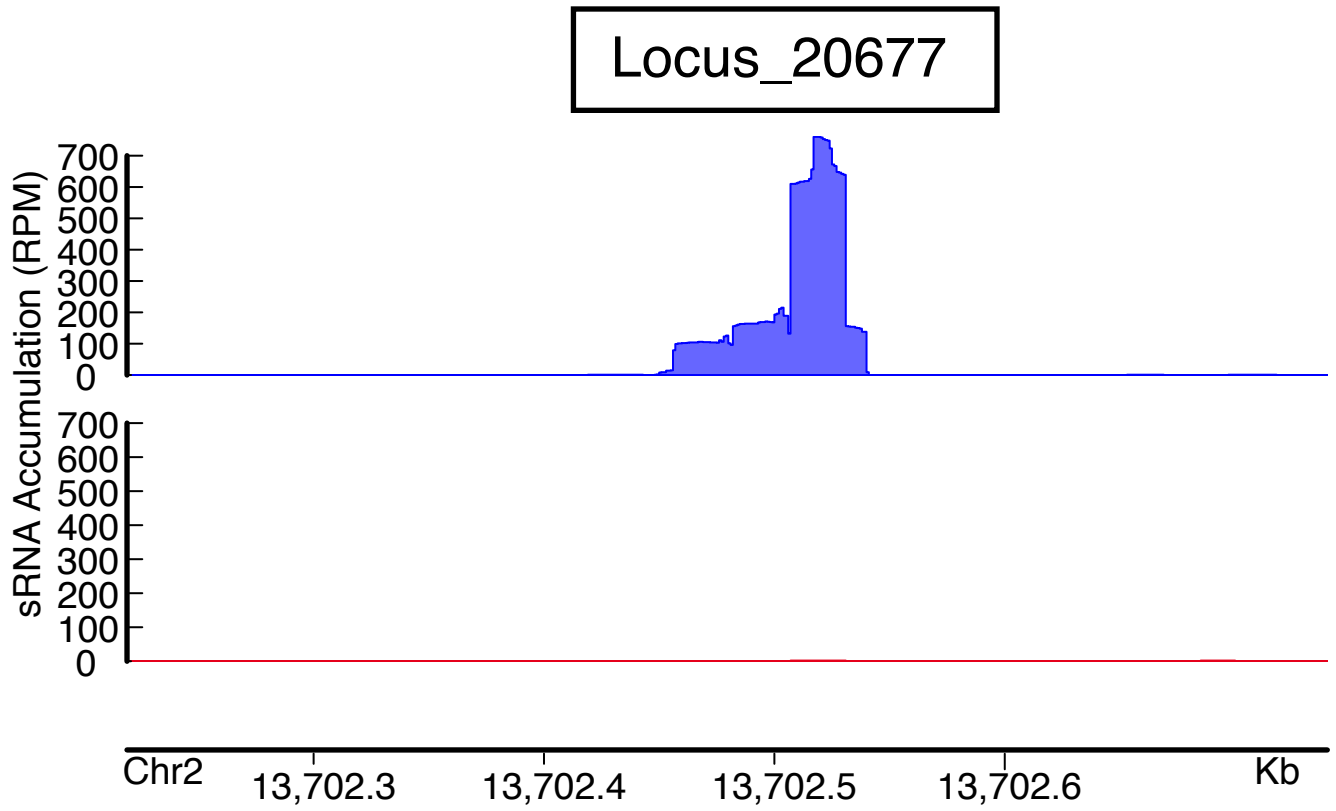

Figure S8 - Page 6

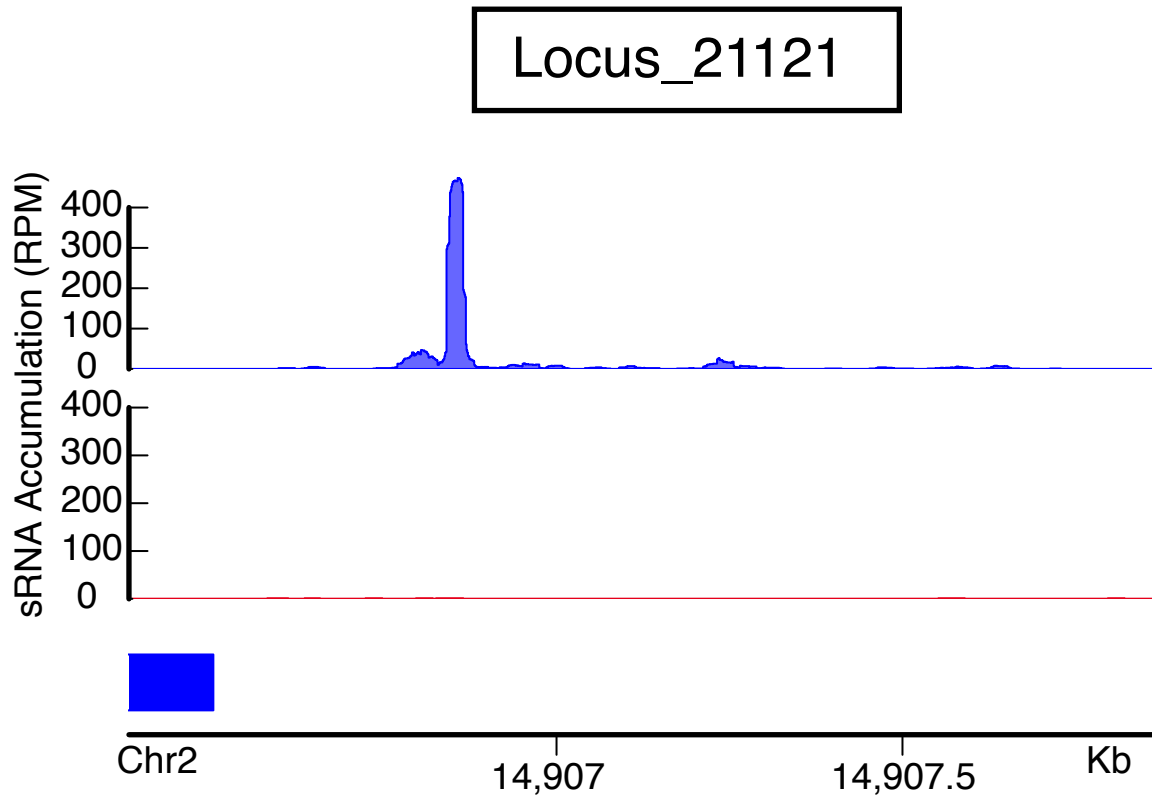

Figure S8 - Page 7

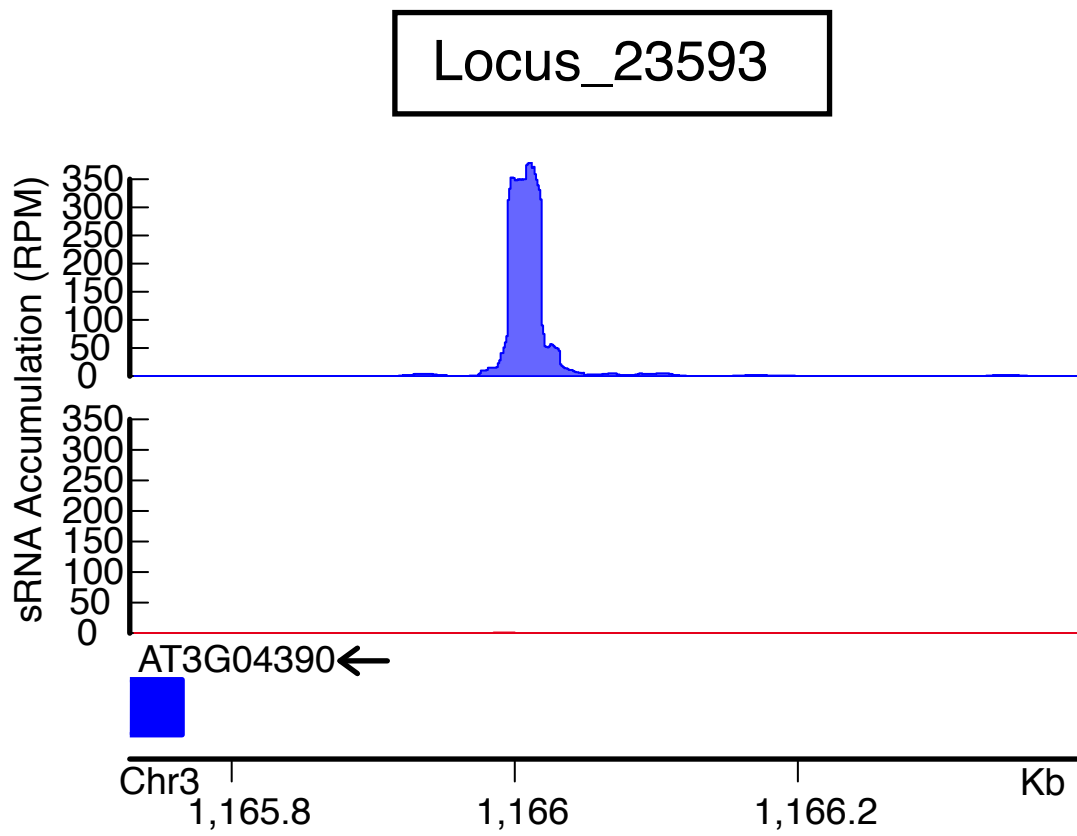

Figure S8 - Page 8

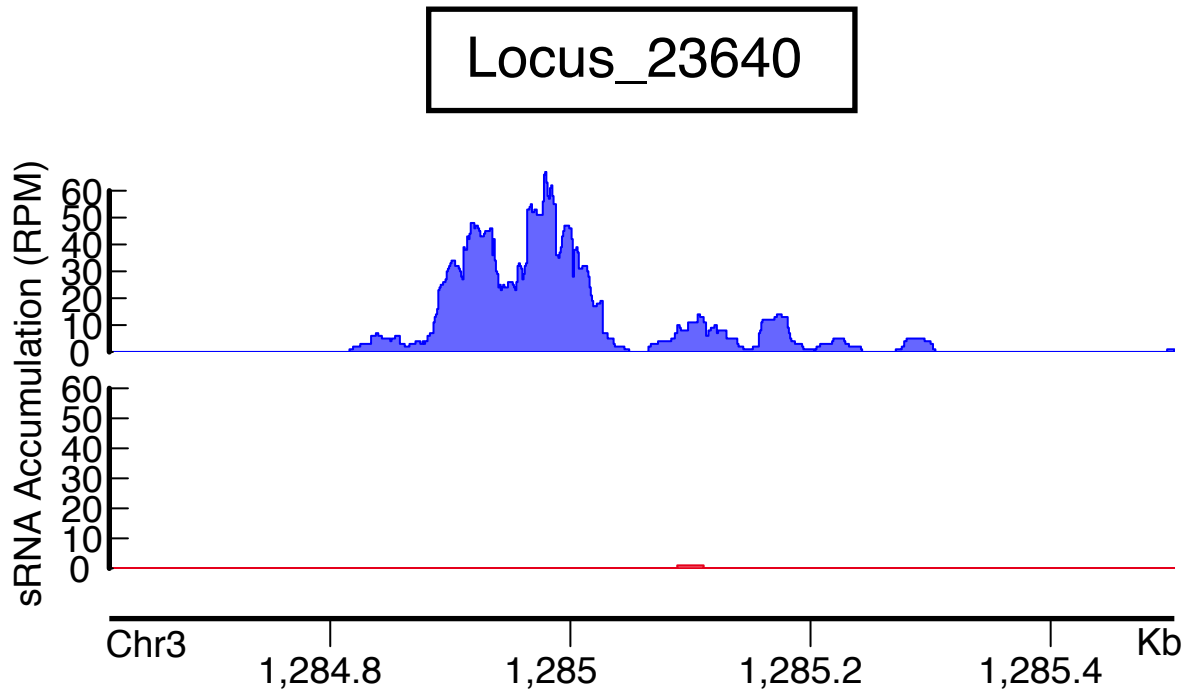

Figure S8 - Page 9

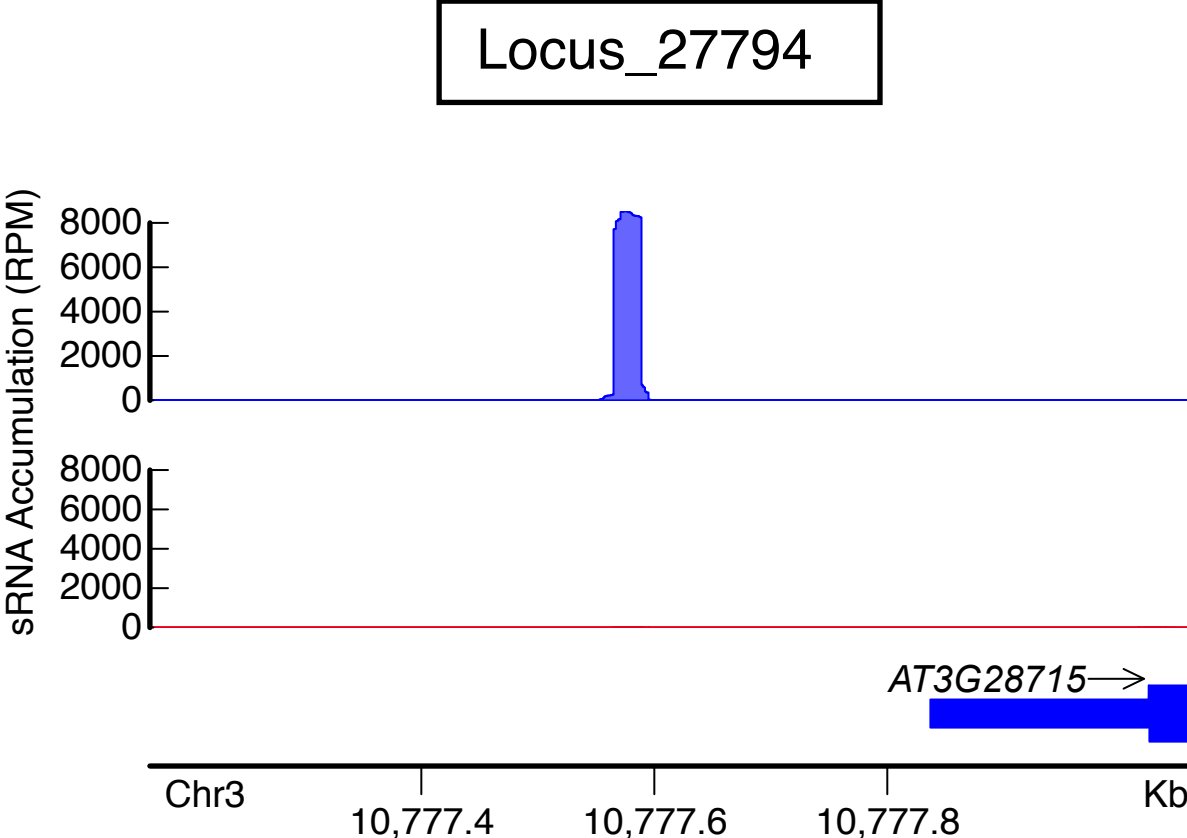



Figure S8 - Page 10

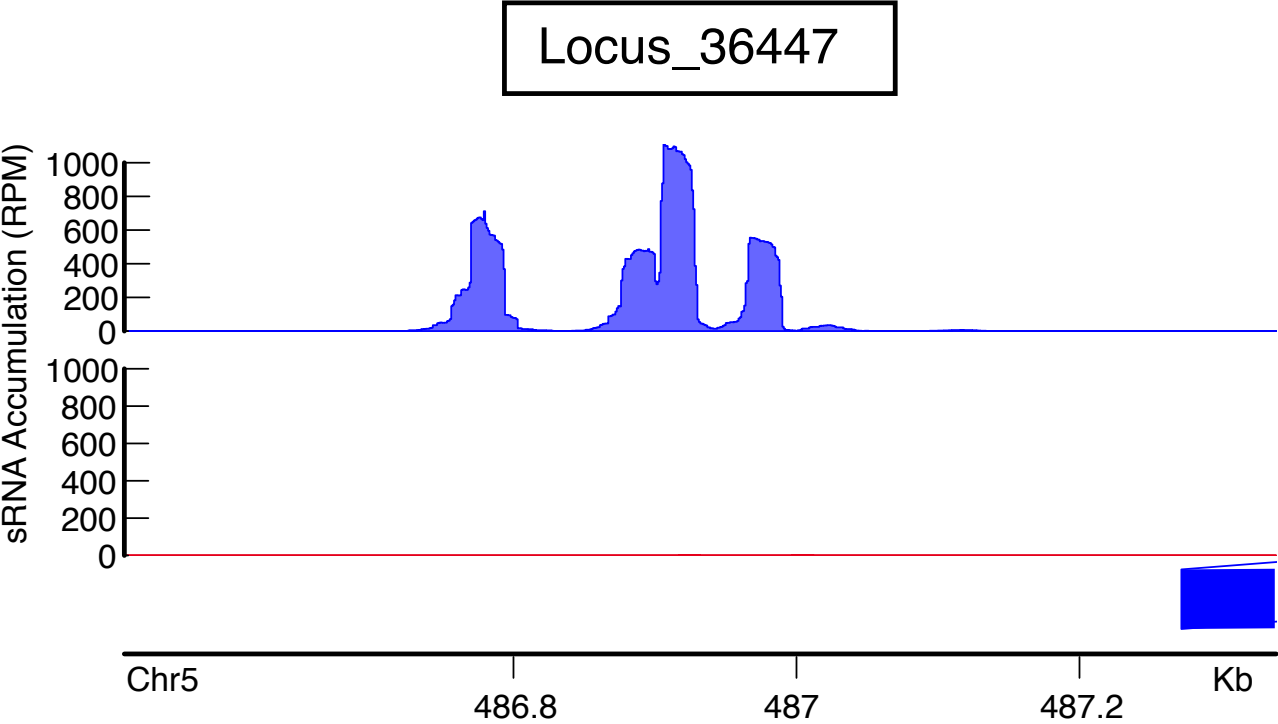

Figure S8 - Page 11

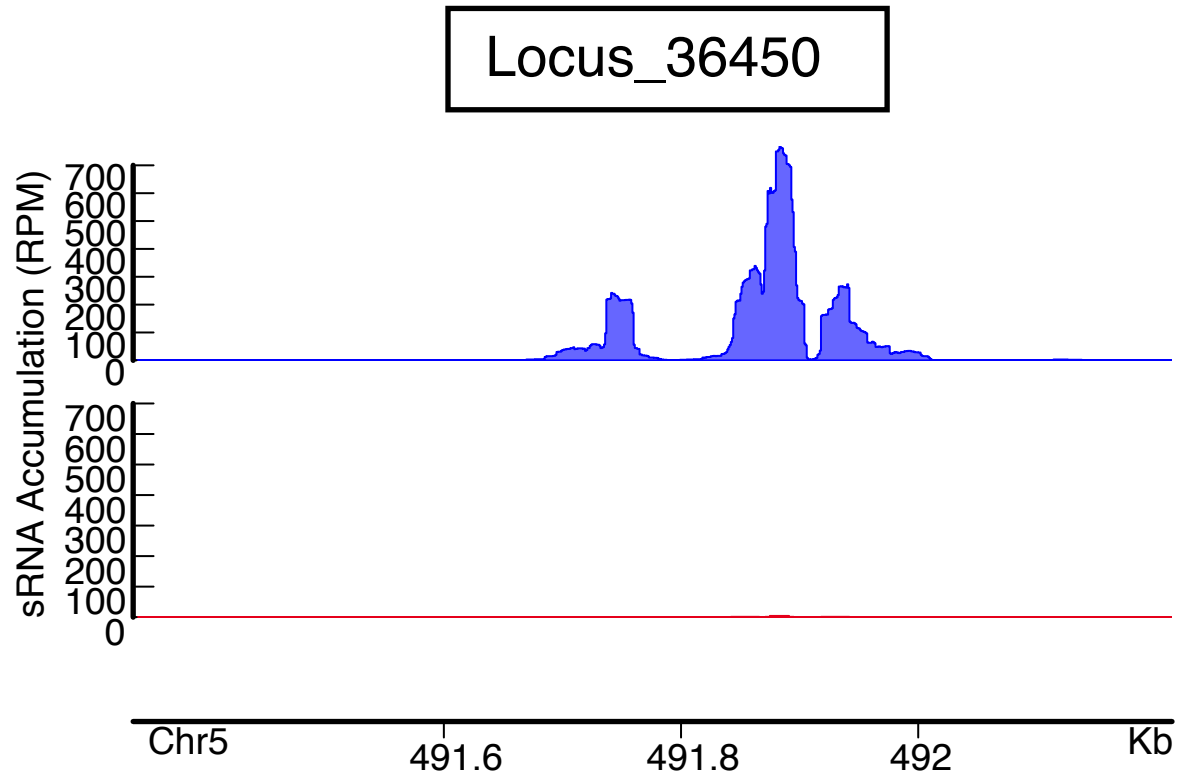

Locus\_45036

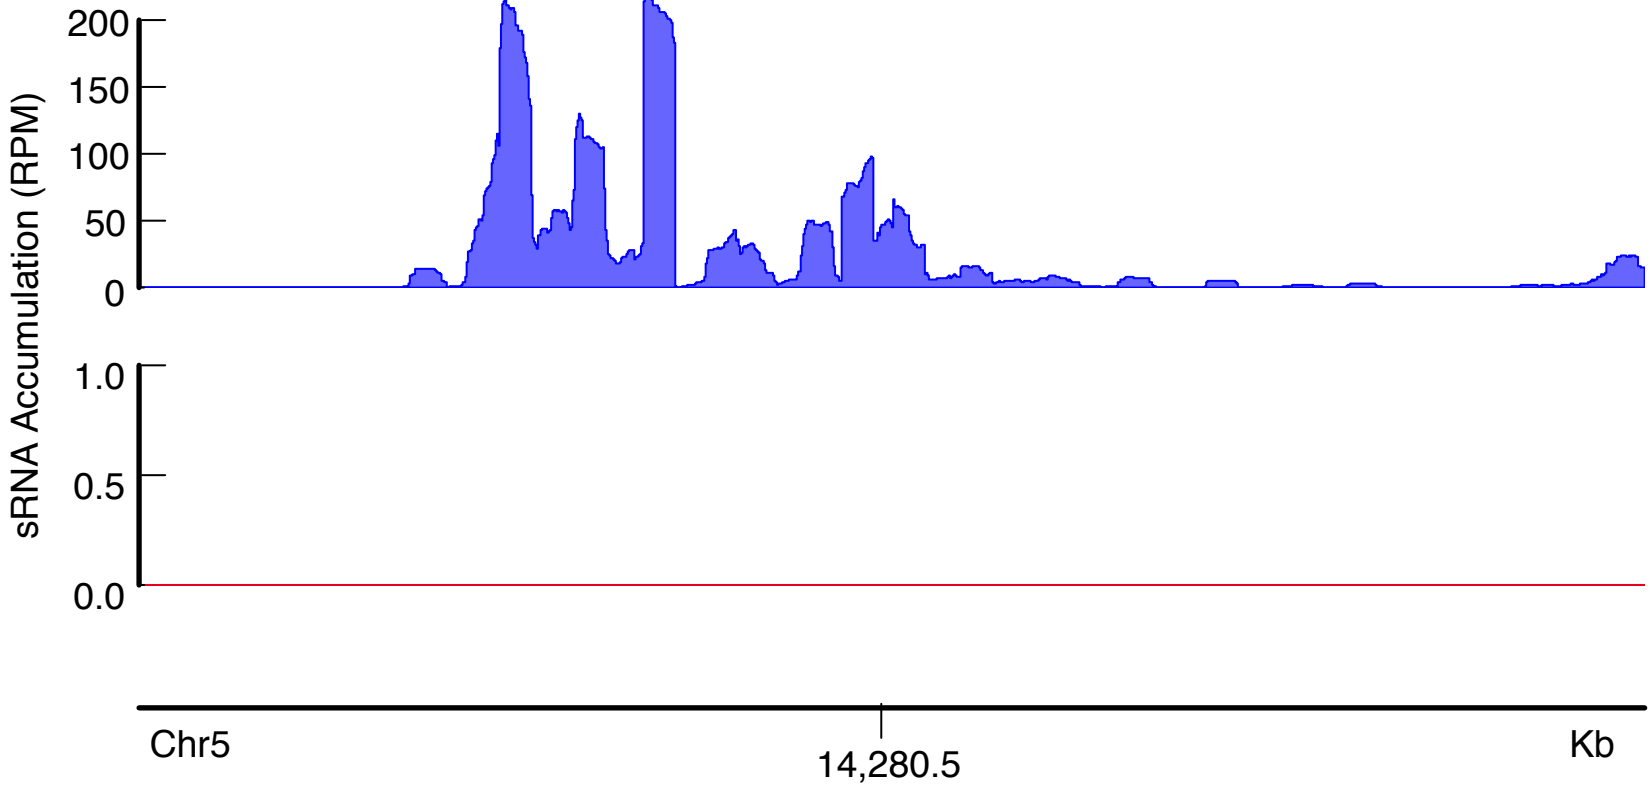

Figure S8 - Page 13

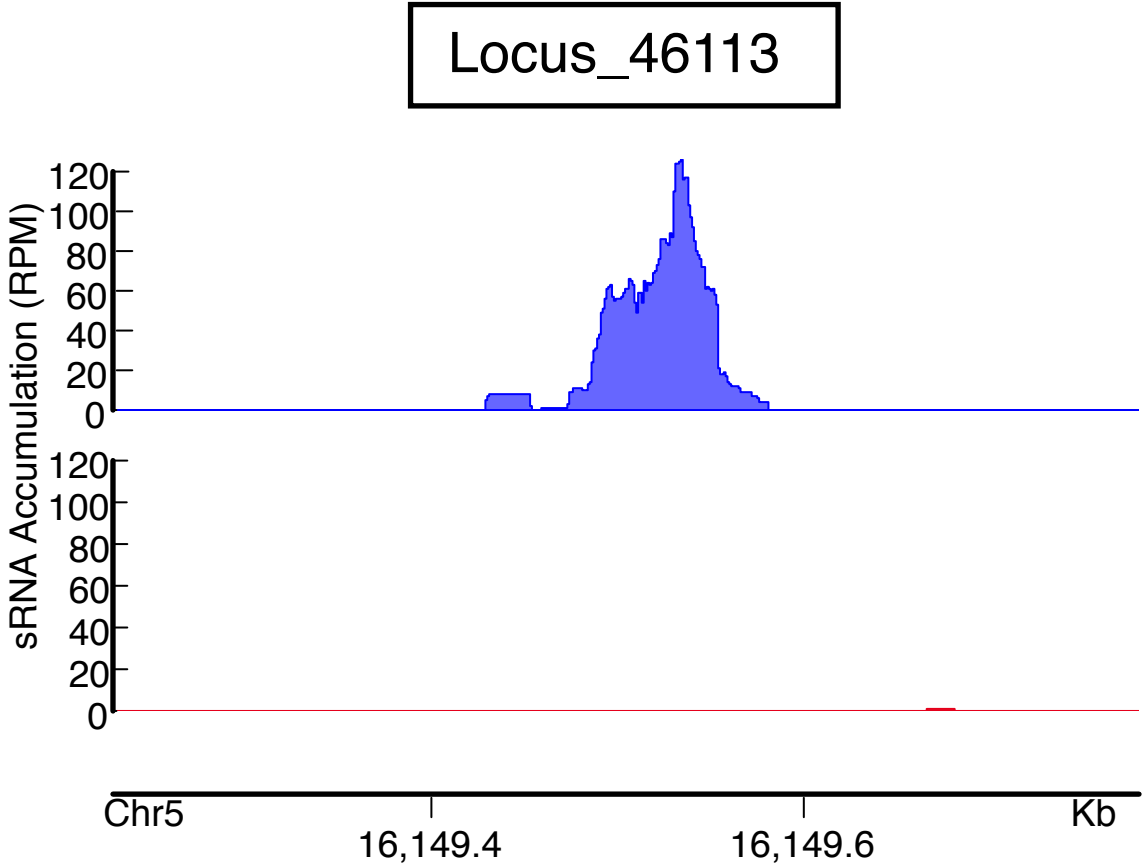

Figure S8 - Page 14

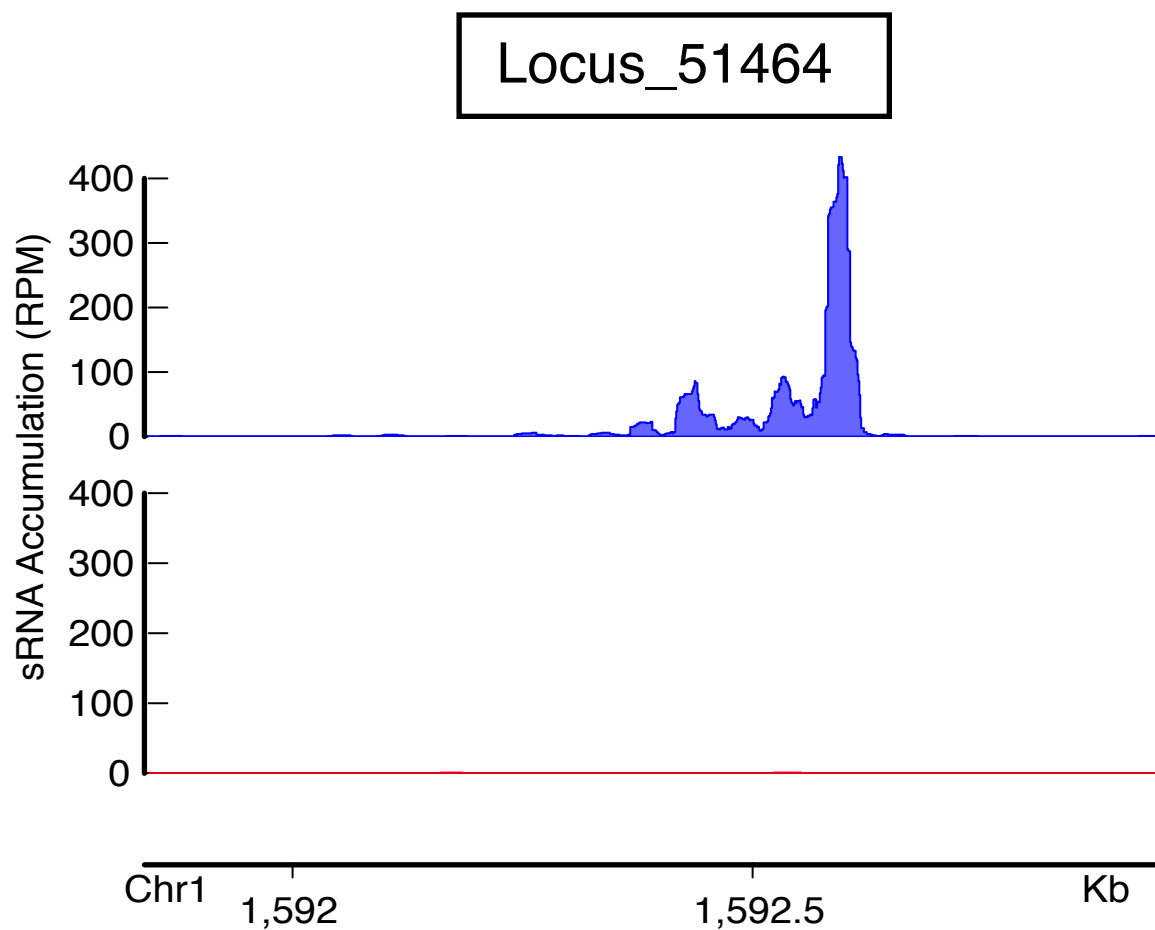

Figure S8 - Page 15

Locus\_54003

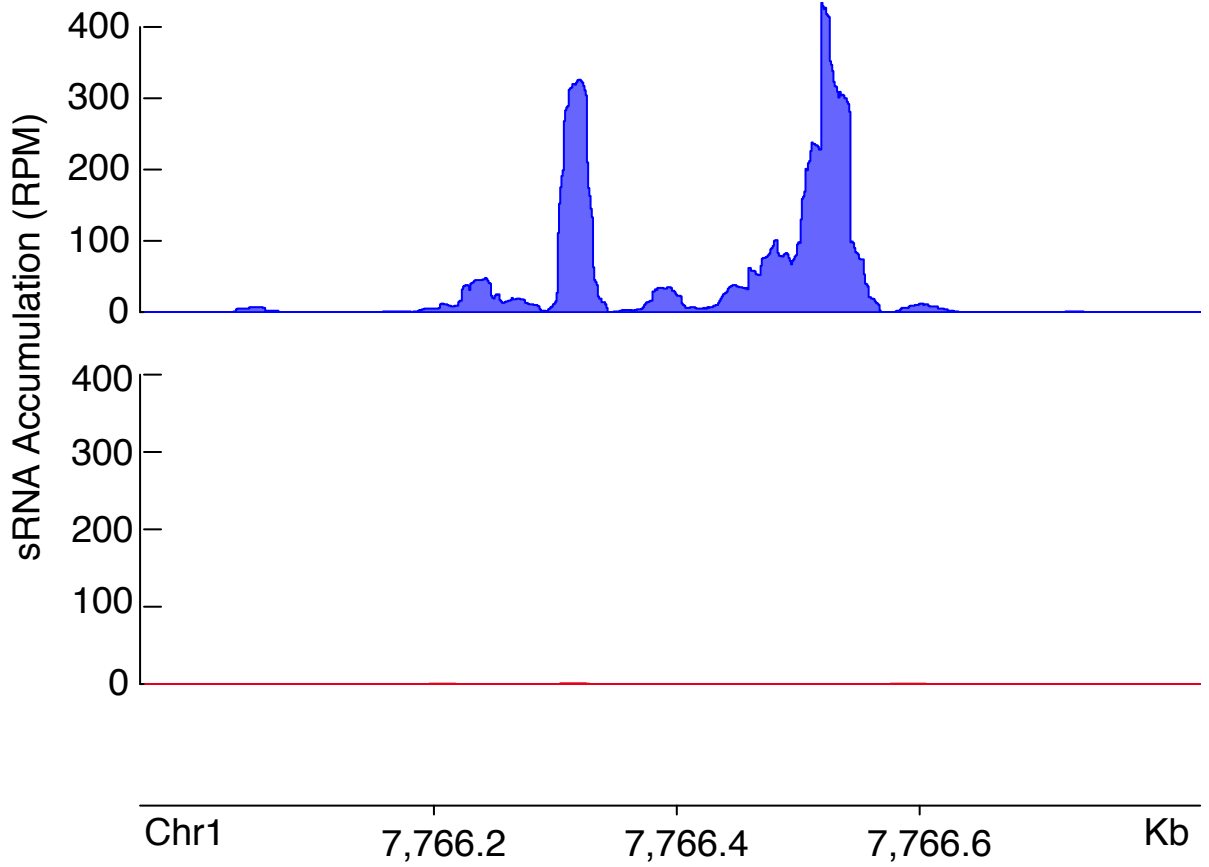

Locus\_59879

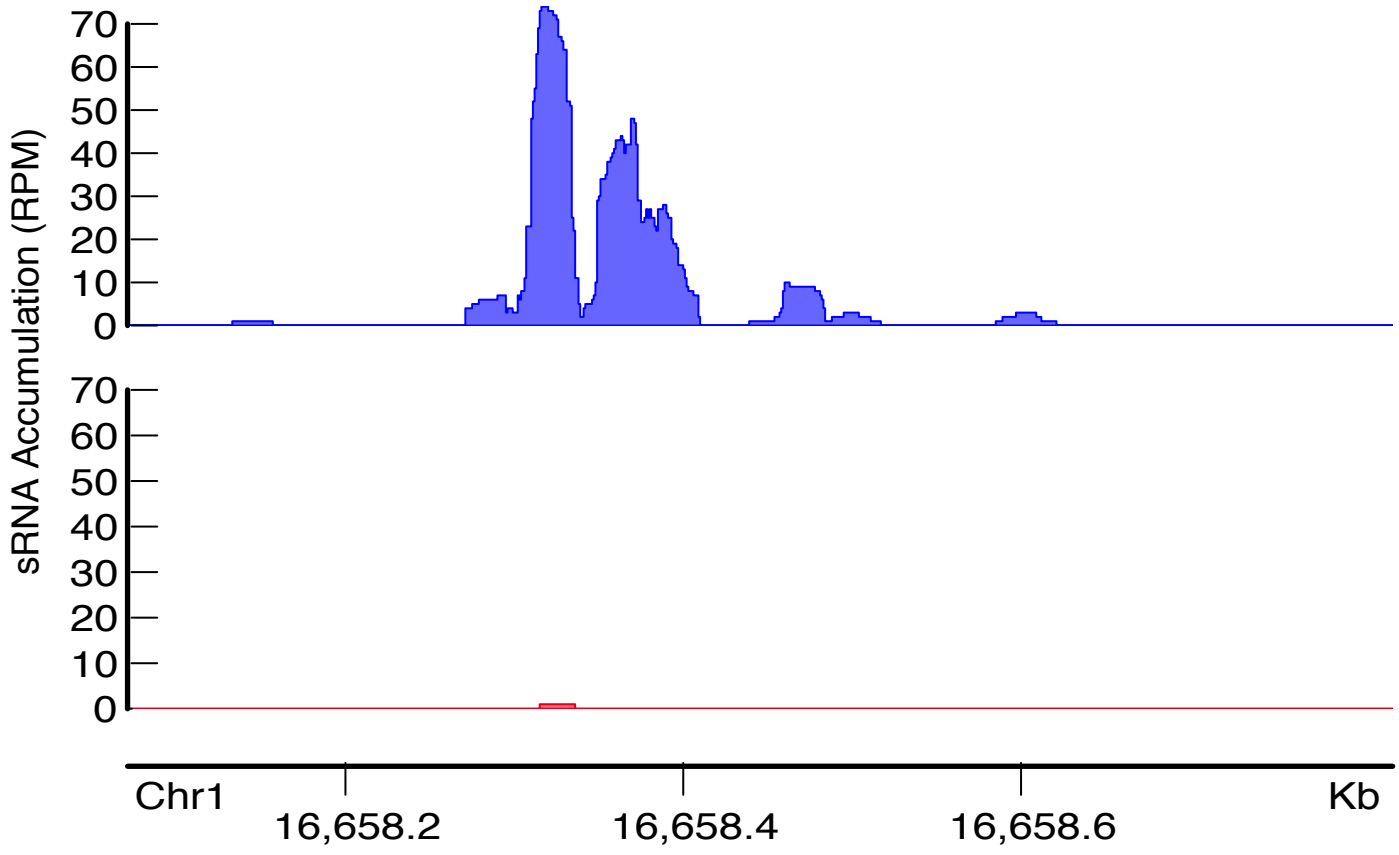

Figure S8 - Page 17

Locus\_62375

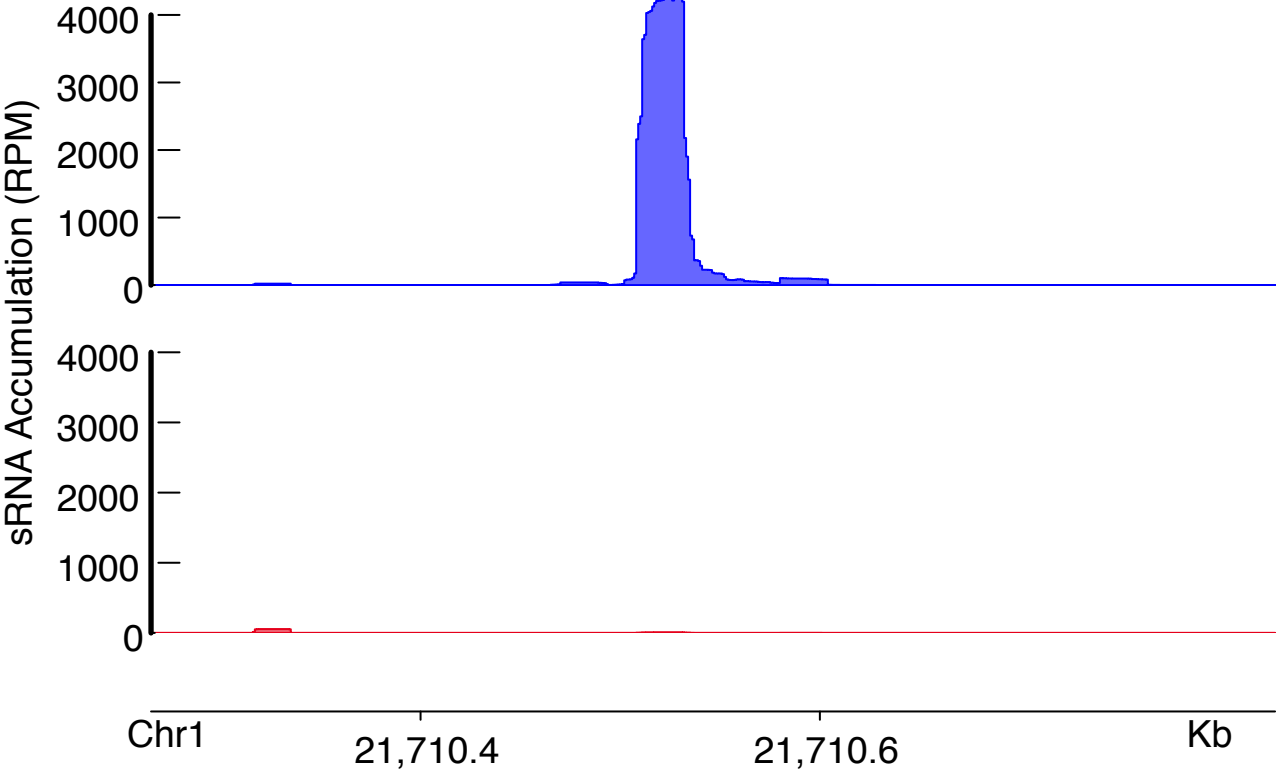



Figure S8 - Page 18

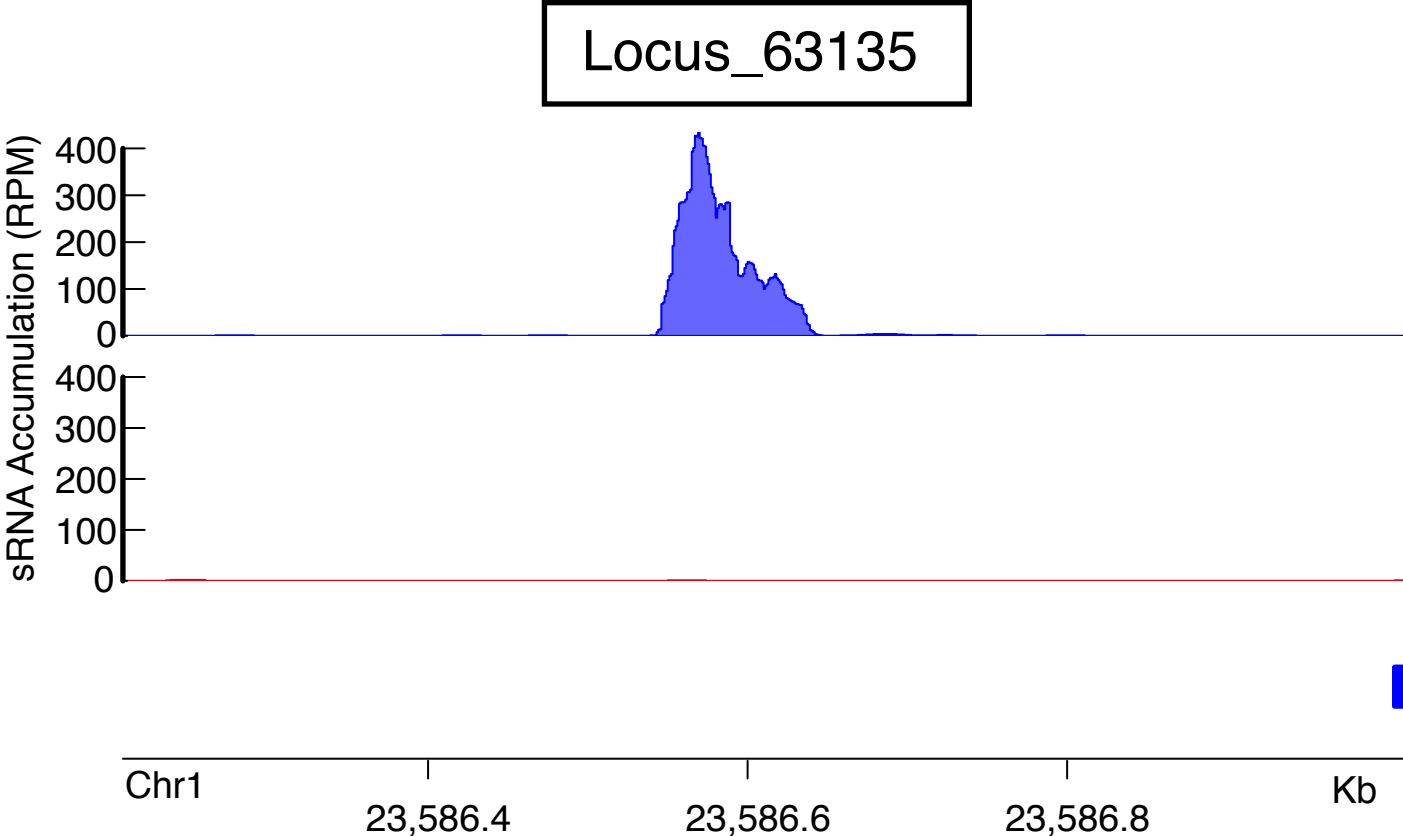

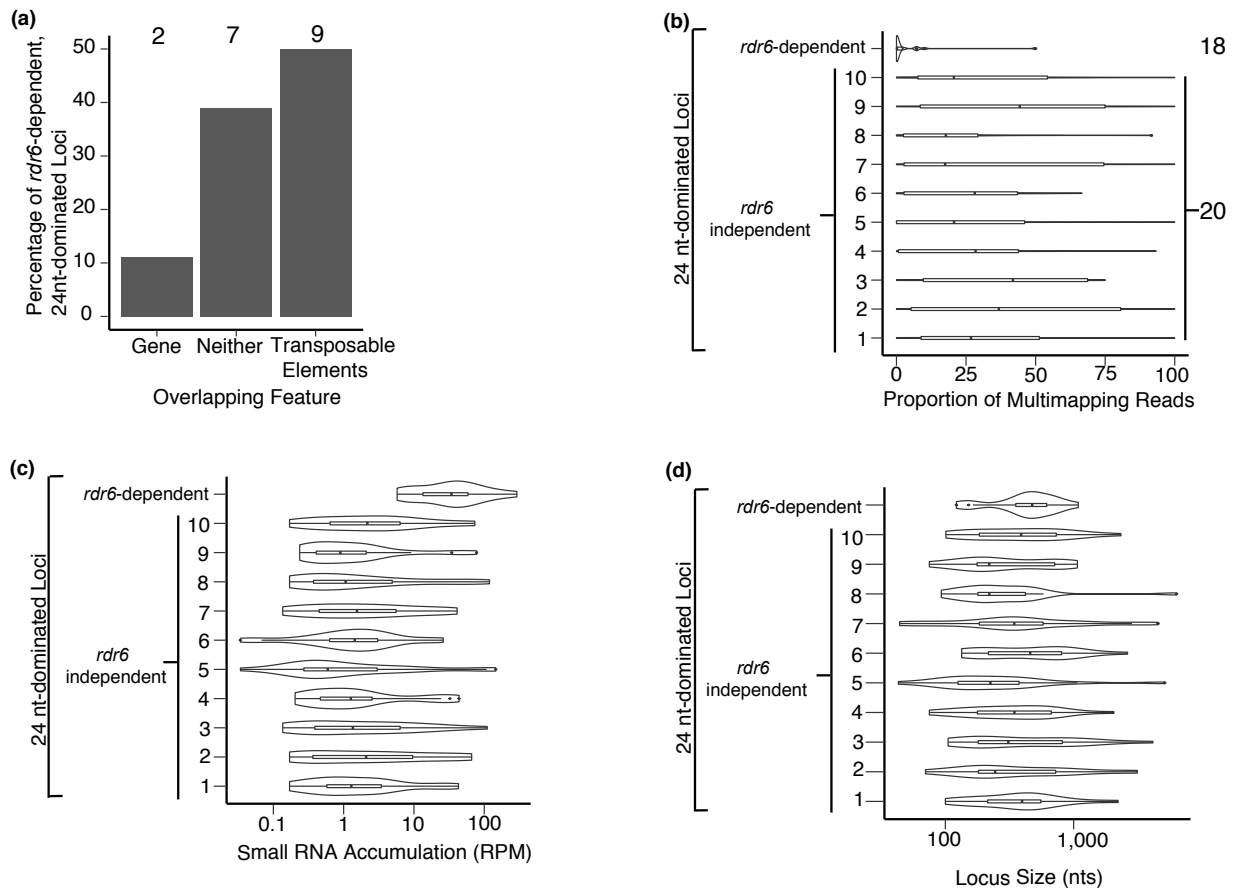

Figure S9. *rdr6*-dependent, 24 nt-dominated loci' characteristics compared to other 24nt-dominated loci.

(a) The overlap between *rdr6*-dependent, 24 nt-dominated loci with genes and transposons was calculated as in Figure 3a. Numbers at the top indicate the count in each category.

(b) The proportion of multi-mapping reads produced at *rdr6*-dependent, 24 nt-dominated loci compared to other 24 nt-dominated loci. Numbers at the top indicate the count in each category.

(c) Same as panel b except showing small RNA accumulation (in RPM). Amount in each category is the same as panel b.

(d) Same as panel b except showing length (in nts). Amount in each category is the same as panel b.

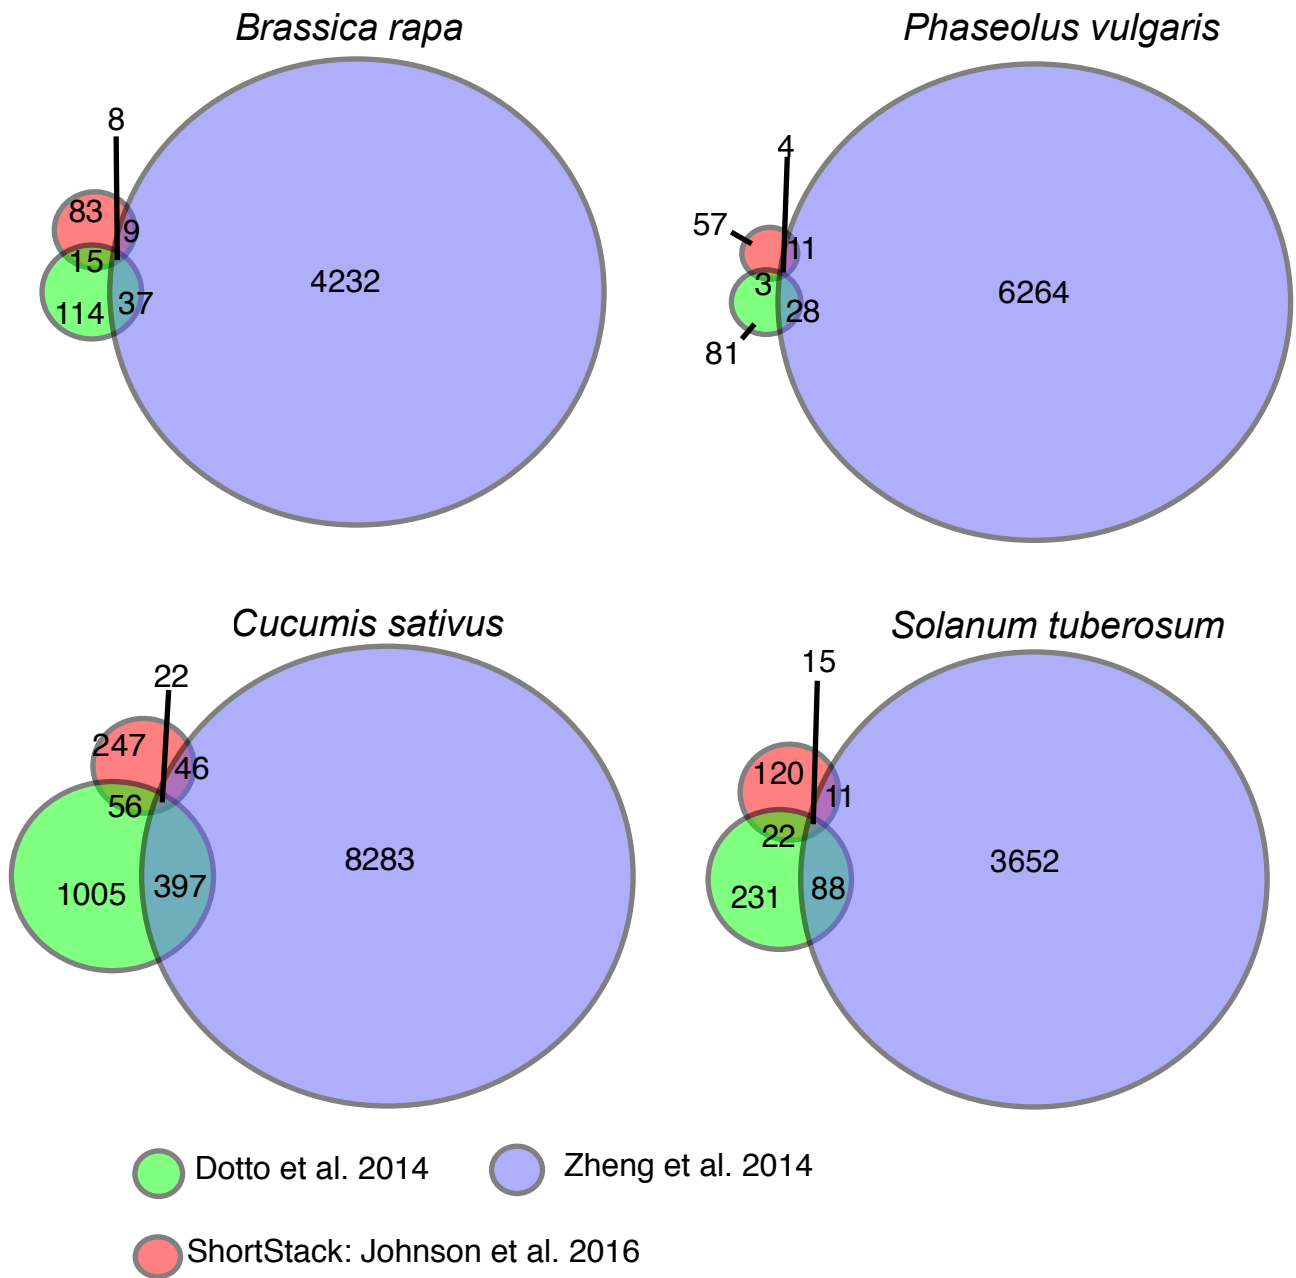

Figure S10. Several 24 nt-dominated small RNA loci pass PHAS-detection algorithms in four other eudicots.

Venn diagram shows numbers of 24 nt-dominated loci that were called 'phased' by the indicated algorithms. Species examined is shown above the graphs.

**Table S1. List of 25 known 21 nt *PHAS* loci in *A. thaliana*.**

| Chr. | Start    | Stop     | Locus Name                   | Source                     |
|------|----------|----------|------------------------------|----------------------------|
| Chr2 | 11721539 | 11722468 | <i>TAS1a</i>                 | (Vazquez et al., 2004)     |
| Chr1 | 18549204 | 18550042 | <i>TAS1b</i>                 | (Allen et al., 2005)       |
| Chr2 | 16537288 | 16538277 | <i>TAS1c</i>                 | (Allen et al., 2005)       |
| Chr2 | 16539384 | 16540417 | <i>TAS2</i>                  | (Allen et al., 2005)       |
| Chr3 | 5861491  | 5862437  | <i>TAS3a</i>                 | (Montgomery et al., 2008)  |
| Chr5 | 20134200 | 20134786 | <i>TAS3b</i>                 | (Howell et al., 2007)      |
| Chr5 | 23394005 | 23394500 | <i>TAS3c</i>                 | (Howell et al., 2007)      |
| Chr3 | 9415004  | 9422587  | <i>TAS4</i>                  | (Rajagopalan et al., 2006) |
| Chr1 | 23299057 | 23300958 | <i>PPR-At1g62910</i>         | (Ronemus et al., 2006)     |
| Chr1 | 23412730 | 23415149 | <i>PPR-At1g63130</i>         | (Ronemus et al., 2006)     |
| Chr1 | 23306534 | 23308683 | <i>PPR-At1g62930</i>         | (Ronemus et al., 2006)     |
| Chr1 | 23387631 | 23390816 | <i>PPR-At1g63080</i>         | (Ronemus et al., 2006)     |
| Chr1 | 23507320 | 23509053 | <i>PPR-At1g63400</i>         | (Ronemus et al., 2006)     |
| Chr1 | 23419396 | 23421579 | <i>PPR-At1g63150</i>         | (Ronemus et al., 2006)     |
| Chr1 | 23385324 | 23387167 | <i>PPR-At1g63070</i>         | (Ronemus et al., 2006)     |
| Chr1 | 23489840 | 23491519 | <i>PPR-At1g63330</i>         | (Ronemus et al., 2006)     |
| Chr1 | 23176930 | 23179248 | <i>PPR-At1g62590</i>         | (Ronemus et al., 2006)     |
| Chr5 | 15555156 | 15558732 | <i>TIR-NBS-LRR-At5g38850</i> | (Howell et al., 2007)      |
| Chr1 | 4368760  | 4371293  | <i>AFB3</i>                  | (Si-Ammour et al., 2011)   |
| Chr5 | 16638370 | 16641728 | <i>ATCHX18</i>               | (Howell et al., 2007)      |
| Chr1 | 17886098 | 17892586 | <i>AGO1</i>                  | (Axtell et al., 2006)      |
| Chr3 | 23273116 | 23276375 | <i>TIR1</i>                  | (Si-Ammour et al., 2011)   |
| Chr4 | 1404887  | 1407139  | <i>AFB1</i>                  | (Si-Ammour et al., 2011)   |
| Chr3 | 9867845  | 9870640  | <i>AFB2</i>                  | (Si-Ammour et al., 2011)   |
| Chr5 | 15757717 | 15758109 | <i>SLG</i>                   | (Chen et al., 2007)        |
| Chr4 | 8380848  | 8383496  | <i>CC-NBS-LRR-At4g14610</i>  | (Zhai et al., 2011)        |
| Chr4 | 8146345  | 8152131  | <i>MET2</i>                  | (Chen et al., 2010)        |

**Reference Cited (Table S1)**

**Allen, E., Xie, Z., Gustafson, A. M., & Carrington, J. C.** (2005). microRNA-directed phasing during trans-acting siRNA biogenesis in plants. *Cell*, *121*(2), 207–221.

<https://doi.org/10.1016/j.cell.2005.04.004>

**Axtell, M. J., Jan, C., Rajagopalan, R., & Bartel, D. P.** (2006). A two-hit trigger for siRNA biogenesis in plants. *Cell*, *127*(3), 565–577. <https://doi.org/10.1016/j.cell.2006.09.032>

- Chen, H.-M., Chen, L.-T., Patel, K., Li, Y.-H., Baulcombe, D. C., & Wu, S.-H.** (2010). 22-nucleotide RNAs trigger secondary siRNA biogenesis in plants. *Proceedings of the National Academy of Sciences of the United States of America*, *107*(34), 15269–15274. <https://doi.org/10.1073/pnas.1001738107>
- Chen, H.-M., Li, Y.-H., & Wu, S.-H.** (2007). Bioinformatic prediction and experimental validation of a microRNA-directed tandem trans-acting siRNA cascade in Arabidopsis. *Proceedings of the National Academy of Sciences*, *104*(9), 3318–3323. <https://doi.org/10.1073/pnas.0611119104>
- Howell, M. D., Fahlgren, N., Chapman, E. J., Cumbie, J. S., Sullivan, C. M., Givan, S. A., & Carrington, J. C.** (2007). Genome-Wide Analysis of the RNA-DEPENDENT RNA POLYMERASE6/DICER-LIKE4 Pathway in Arabidopsis Reveals Dependency on miRNA- and tasiRNA-Directed Targeting. *The Plant Cell*, *19*(3), 926–942. <https://doi.org/10.1105/tpc.107.050062>
- Montgomery, T. A., Howell, M. D., Cuperus, J. T., Li, D., Hansen, J. E., Alexander, A. L., & Carrington, J. C.** (2008). Specificity of ARGONAUTE7-miR390 Interaction and Dual Functionality in TAS3 Trans-Acting siRNA Formation. *Cell*, *133*(1), 128–141. <https://doi.org/10.1016/j.cell.2008.02.033>
- Rajagopalan, R., Vaucheret, H., Trejo, J., & Bartel, D. P.** (2006). A diverse and evolutionarily fluid set of microRNAs in Arabidopsis thaliana. *Genes & Development*, *20*(24), 3407–3425. <https://doi.org/10.1101/gad.1476406>
- Ronemus, M., Vaughn, M. W., & Martienssen, R. A.** (2006). MicroRNA-Targeted and Small Interfering RNA-Mediated mRNA Degradation Is Regulated by Argonaute, Dicer, and

RNA-Dependent RNA Polymerase in Arabidopsis. *The Plant Cell*, 18(7), 1559–1574.  
<https://doi.org/10.1105/tpc.106.042127>

- Si-Ammour, A., Windels, D., Arn-Bouloires, E., Kutter, C., Ailhas, J., Meins, F., & Vazquez, F.** (2011). miR393 and Secondary siRNAs Regulate Expression of the TIR1/AFB2 Auxin Receptor Clade and Auxin-Related Development of Arabidopsis Leaves. *Plant Physiology*, 157(2), 683–691. <https://doi.org/10.1104/pp.111.180083>
- Vazquez, F., Vaucheret, H., Rajagopalan, R., Lepers, C., Gascioli, V., Mallory, A. C., & Cr  t  , P.** (2004). Endogenous trans-Acting siRNAs Regulate the Accumulation of Arabidopsis mRNAs. *Molecular Cell*, 16(1), 69–79.  
<https://doi.org/10.1016/j.molcel.2004.09.028>
- Zhai, J., Jeong, D.-H., Paoli, E. D., Park, S., Rosen, B. D., Li, Y., & Meyers, B. C.** (2011). MicroRNAs as master regulators of the plant NB-LRR defense gene family via the production of phased, trans-acting siRNAs. *Genes & Development*, 25(23), 2540–2553.  
<https://doi.org/10.1101/gad.177527.111>

**Table S2. *A. thaliana* small RNA libraries used in this study**

| <b>Accession Number</b> | <b>Genotype</b>                    | <b>3' Adapter (First 8 nts)</b> | <b>Source</b>                 |
|-------------------------|------------------------------------|---------------------------------|-------------------------------|
| GSM2825283              | Wild-type Replicate 1              | TGGAATTC                        | (Polydore & Axtell, 2018)     |
| GSM2825284              | Wild-type Replicate 2              | TGGAATTC                        | (Polydore & Axtell, 2018)     |
| GSM2825285              | Wild-type Replicate 3              | TGGAATTC                        | (Polydore & Axtell, 2018)     |
| GSM2825286              | <i>rdr1-1/2-1/6-15</i> Replicate 1 | TGGAATTC                        | (Polydore & Axtell, 2018)     |
| GSM2825287              | <i>rdr1-1/2-1/6-15</i> Replicate 2 | TGGAATTC                        | (Polydore & Axtell, 2018)     |
| GSM2825288              | <i>rdr1-1/2-1/6-15</i> Replicate 3 | TGGAATTC                        | (Polydore & Axtell, 2018)     |
| GSM1533527              | Wild-type Replicate 1              | TGGAATTC                        | (Groth et al., 2014)          |
| GSM1533528              | Wild-type Replicate 2              | TGGAATTC                        | (Groth et al., 2014)          |
| GSM1533529              | Wild-type Replicate 3              | TGGAATTC                        | (Groth et al., 2014)          |
| GSM1533542              | <i>dcl3</i> Replicate 1            | TGGAATTC                        | (Groth et al., 2014)          |
| GSM1533543              | <i>dcl3</i> Replicate 2            | TGGAATTC                        | (Groth et al., 2014)          |
| GSM1533544              | <i>dcl3</i> Replicate 3            | TGGAATTC                        | (Groth et al., 2014)          |
| GSM1845210              | Wild-type Replicate 1              | AGATCGGA                        | (Elvira-Matelot et al., 2016) |
| GSM1845211              | Wild-type Replicate 2              | AGATCGGA                        | (Elvira-Matelot et al., 2016) |
| GSM1845212              | Wild-type Replicate 3              | AGATCGGA                        | (Elvira-Matelot et al., 2016) |
| GSM1845222              | <i>dcl2-1/3-1/4-2t</i> Replicate 1 | AGATCGGA                        | (Elvira-Matelot et al., 2016) |
| GSM1845223              | <i>dcl2-1/3-1/4-2t</i> Replicate 2 | AGATCGGA                        | (Elvira-Matelot et al., 2016) |
| GSM1845224              | <i>dcl2-1/3-1/4-2t</i> Replicate 3 | AGATCGGA                        | (Elvira-Matelot et al., 2016) |
| GSM1087973              | Wild-type Replicate 1              | TCGTATGC                        | (Jeong et al., 2013)          |
| GSM1087974              | Wild-type Replicate 2              | TCGTATGC                        | (Jeong et al., 2013)          |
| GSM1087975              | <i>dcl1-7</i> Replicate 1          | TCGTATGC                        | (Jeong et al., 2013)          |
| GSM1087976              | <i>dcl1-7</i> Replicate 2          | TCGTATGC                        | (Jeong et al., 2013)          |
| GSM1377370              | Wild-type Replicate 1              | TGGAATTC                        | (Li et al., 2014)             |
| GSM1377371              | Wild-type Replicate 2              | TGGAATTC                        | (Li et al., 2014)             |
| GSM1377372              | <i>nrpd1-3</i> Replicate 1         | TGGAATTC                        | (Li et al., 2014)             |
| GSM1377373              | <i>nrpd1-3</i> Replicate 2         | TGGAATTC                        | (Li et al., 2014)             |
| GSM1377376              | <i>rdr2-1</i> Replicate 1          | TGGAATTC                        | (Li et al., 2014)             |

|            |                                   |          |                      |
|------------|-----------------------------------|----------|----------------------|
| GSM1377377 | <i>rdr2-1</i> Replicate 2         | TGGAATTC | (Li et al., 2014)    |
| GSM2102962 | Wild-type Replicate 1             | TGGAATTC | (Panda et al., 2016) |
| GSM2102963 | Wild-type Replicate 2             | TGGAATTC | (Panda et al., 2016) |
| GSM2102965 | <i>rdr6-15</i> Replicate 1        | TGGAATTC | (Panda et al., 2016) |
| GSM2102462 | <i>rdr6-15</i> Replicate 2        | TGGAATTC | (Panda et al., 2016) |
| GSM893112  | Wild-type Replicate 1             | CACTCGGG | (Lee et al., 2012)   |
| GSM893113  | Wild-type Replicate 2             | CACTCGGG | (Lee et al., 2012)   |
| GSM893114  | Wild-type Replicate 3             | CACTCGGG | (Lee et al., 2012)   |
| GSM893115  | <i>nrbp1-1 (nrpe)</i> Replicate 1 | CACTCGGG | (Lee et al., 2012)   |
| GSM893116  | <i>nrbp1-1 (nrpe)</i> Replicate 2 | CACTCGGG | (Lee et al., 2012)   |
| GSM893117  | <i>nrbp1-1 (nrpe)</i> Replicate 3 | CACTCGGG | (Lee et al., 2012)   |
| GSM1668899 | Wild-type Replicate 1             | TGGAATTC | (Zhai et al., 2015)  |
| GSM1668905 | Wild-type Replicate 2             | TGGAATTC | (Zhai et al., 2015)  |

### Reference List (Table S2)

**Elvira-Matlot, E., Hachet, M., Shamandi, N., Comella, P., Sáez-Vásquez, J., Zytnicki, M.,**

**& Vaucheret, H.** (2016). Arabidopsis RNASE THREE LIKE2 Modulates the Expression of Protein-Coding Genes via 24-Nucleotide Small Interfering RNA-Directed DNA

Methylation. *The Plant Cell Online*, 28(2), 406–425.

<https://doi.org/10.1105/tpc.15.00540>

**Groth, M., Stroud, H., Feng, S., Greenberg, M. V. C., Vashisht, A. A., Wohlschlegel, J. A.,**

**& Ausin, I.** (2014). SNF2 chromatin remodeler-family proteins FRG1 and -2 are required for RNA-directed DNA methylation. *Proceedings of the National Academy of Sciences of the United States of America*, 111(49), 17666–17671.

<https://doi.org/10.1073/pnas.1420515111>

**Jeong, D.-H., Thatcher, S. R., Brown, R. S. H., Zhai, J., Park, S., Rymarquis, L. A., &**

**Green, P. J.** (2013). Comprehensive Investigation of MicroRNAs Enhanced by Analysis of Sequence Variants, Expression Patterns, ARGONAUTE Loading, and Target Cleavage1[W][OA]. *Plant Physiology*, 162(3), 1225–1245.

<https://doi.org/10.1104/pp.113.219873>



- Lee, T., Gurazada, S. G. R., Zhai, J., Li, S., Simon, S. A., Matzke, M. A., & Meyers, B. C.** (2012). RNA polymerase V-dependent small RNAs in Arabidopsis originate from small, intergenic loci including most SINE repeats. *Epigenetics*, 7(7), 781–795.  
<https://doi.org/10.4161/epi.20290>
- Li, S., Vandivier, L. E., Tu, B., Gao, L., Won, S. Y., Li, S., & Chen, X.** (2014). Detection of Pol IV/RDR2-dependent transcripts at the genomic scale in Arabidopsis reveals features and regulation of siRNA biogenesis. *Genome Research*, gr.182238.114.  
<https://doi.org/10.1101/gr.182238.114>
- Panda, K., Ji, L., Neumann, D. A., Daron, J., Schmitz, R. J., & Slotkin, R. K.** (2016). Full-length autonomous transposable elements are preferentially targeted by expression-dependent forms of RNA-directed DNA methylation. *Genome Biology*, 17, 170.  
<https://doi.org/10.1186/s13059-016-1032-y>
- Polydore, S., & Axtell, M. J.** (2018). Analysis of RDR1/RDR2/RDR6-independent small RNAs in Arabidopsis thaliana improves MIRNA annotations and reveals unexplained types of short interfering RNA loci. *The Plant Journal: For Cell and Molecular Biology*, 94(6), 1051–1063. <https://doi.org/10.1111/tpj.13919>
- Zhai, J., Bischof, S., Wang, H., Feng, S., Lee, T., Teng, C., & Jacobsen, S. E.** (2015). One precursor One siRNA model for Pol IV- dependent siRNAs Biogenesis. *Cell*, 163(2), 445–455. <https://doi.org/10.1016/j.cell.2015.09.032>
